1 **Atrial natriuretic peptide orchestrates a coordinated physiological response to fuel non**  
2 **shivering thermogenesis**

3  
4 Deborah Carper<sup>1,2</sup>, Marine Coue<sup>1,2,3</sup>, Emmani Nascimento<sup>4</sup>, Valentin Barquissau<sup>1,2,5</sup>, Damien  
5 Lagarde<sup>6</sup>, Carine Pestourie<sup>7</sup>, Claire Laurens<sup>1,2</sup>, Justine Vily Petit<sup>13</sup>, Maud Soty<sup>13</sup>, Laurent  
6 Monbrun<sup>1,2</sup>, Marie-Adeline Marques<sup>1,2</sup>, Yannick Jeanson<sup>6</sup>, Yannis Sainte-Marie<sup>2,8</sup>, Aline  
7 Mairal<sup>1,2</sup>, Sébastien Dejean<sup>9</sup>, Geneviève Tavernier<sup>1,2</sup>, Nathalie Viguerie<sup>1,2</sup>, Virginie  
8 Bourlier<sup>1,2</sup>, Frank Lezoualc'h<sup>2,8</sup>, Audrey Carrière<sup>2,6</sup>, Wim H.M. Saris<sup>10</sup>, Arne Astrup<sup>11</sup>, Louis  
9 Casteilla<sup>2,6</sup>, Gilles Mithieux<sup>13</sup>, Wouter van Marken Lichtenbelt<sup>4</sup>, Dominique Langin<sup>1,2,12</sup>,  
10 Patrick Schrauwen<sup>4</sup>, and Cedric Moro<sup>1,2,\*</sup>

11  
12 <sup>1</sup>INSERM, UMR1048, Institute of Metabolic and Cardiovascular Diseases, Obesity Research  
13 Laboratory, Toulouse, France

14 <sup>2</sup>University of Toulouse, UPS, France

15 <sup>3</sup>Current address: INRA, UMR1280, Laboratory of Physiopathology of Nutritional  
16 Adaptations, Nantes, France, and The Research Center in Human Nutrition, Nantes, France

17 <sup>4</sup>Department of Nutrition and Movement Sciences, NUTRIM School for Nutrition and  
18 Translational Research in Metabolism, Maastricht University Medical Center, Maastricht, The  
19 Netherlands

20 <sup>5</sup>Current address: Center for Integrative Genomics, University of Lausanne, Switzerland

21 <sup>6</sup>INSERM, UMR1031, STROMALab, CNRS, EFS, ENVY, Inserm U1031, ERL 5311,  
22 Toulouse, France

23 <sup>7</sup>CREFRE, University of Toulouse, Inserm UMS006, UPS, ENVY, Team Non Invasive  
24 Exploration, Toulouse, France

25 <sup>8</sup>INSERM, UMR1048, Institute of Metabolic and Cardiovascular Diseases, Signalling and  
26 Pathophysiology of Heart Failure Laboratory, Toulouse, France

27 <sup>9</sup>Toulouse Mathematics Institute, UMR 5219 University of Toulouse and CNRS

28 <sup>10</sup>Department of Human Biology, NUTRIM School for Nutrition and Translational Research  
29 in Metabolism, Maastricht University Medical Center, Maastricht, The Netherlands

30 <sup>11</sup>Department of Nutrition, Exercise and Sports, Faculty of Sciences, University of  
31 Copenhagen, Copenhagen, Denmark

32 <sup>12</sup>Toulouse University Hospitals, Department of Clinical Biochemistry, Toulouse, France

33 <sup>13</sup>INSERM U1213, Nutrition, Diabète et Cerveau, Lyon, France

34

35 **\*Correspondence:** [Cedric.Moro@inserm.fr](mailto:Cedric.Moro@inserm.fr)

36 **Abstract**

37 Atrial natriuretic peptide (ANP) is a cardiac hormone controlling blood volume and arterial  
38 pressure in mammals. It is unclear whether and how ANP controls cold-induced  
39 thermogenesis *in vivo*. Here we show that acute cold exposure induces cardiac ANP secretion  
40 in mice and humans. Genetic inactivation of ANP promotes cold intolerance and suppresses  
41 about half of cold-induced brown adipose tissue (BAT) activation in mice. While white  
42 adipocytes are resistant to ANP-mediated lipolysis at thermoneutral temperature in mice, cold  
43 exposure renders white adipocytes fully responsive to ANP to activate lipolysis and a  
44 thermogenic program, a physiological response which is dramatically suppressed in ANP null  
45 mice. ANP deficiency also blunts liver triglycerides and glycogen metabolism thus impairing  
46 fuel availability for BAT thermogenesis. ANP directly increases mitochondrial uncoupling  
47 and thermogenic genes expression in human white and brown adipocytes. Together, these  
48 results indicate that ANP is a major physiological trigger of BAT thermogenesis upon cold  
49 exposure in mammals.

50

51 **Keywords:** brown adipose tissue; thermogenesis; uncoupling protein 1; white adipose tissue  
52 browning; lipolysis; adipocyte.

## 53 **Introduction**

54 Warm blooded animals have acquired the ability to maintain their core body temperature  
55 constant in fluctuating temperature environments through an adaptive physiological process  
56 called thermogenesis. Brown adipose tissue (BAT) is considered the major site of non-  
57 shivering thermogenesis and heat production, which allows rodents to maintain euthermia at  
58 temperatures below thermoneutrality <sup>1</sup>.

59 Thermogenic fat cells include brown and beige adipocytes, cells that play a critical  
60 role in defending against hypothermia, obesity, and diabetes through dissipating chemical  
61 energy as heat in part through mitochondrial uncoupling protein 1 (UCP1) <sup>2</sup>. Thermogenic  
62 genes can be readily induced in brown and beige adipocytes within white adipose tissue  
63 (WAT) in response to cold exposure <sup>3-5</sup>. When activated, thermogenic adipocytes consume  
64 large amount of circulating triglycerides, glucose and non esterified fatty acid (NEFA) <sup>6</sup>. The  
65 long-standing prevailing view is that cold sensation is primarily transmitted through the  
66 sympathetic nervous system. BAT and WAT are innervated by sympathetic fibers <sup>7</sup>, which,  
67 upon cold exposure, release norepinephrine to acutely activate thermogenesis and lipolysis.  
68 Norepinephrine activates  $\beta_3$ -adrenergic receptors and cAMP-dependent protein kinase (PKA)  
69 that elicit a signaling cascade via p38 mitogen-activated protein kinase (p38 MAPK) and  
70 peroxisome proliferator-activated receptor (PPAR)- $\gamma$  co-activator 1 $\alpha$  (PGC1 $\alpha$ ) to increase the  
71 transcription of UCP1 and thermogenic genes in brown adipocytes <sup>8</sup>. In WAT,  $\beta_3$ -adrenergic  
72 signaling activates adipocyte lipolysis through adipose triglyceride lipase (ATGL) and  
73 hormone-sensitive lipase (HSL). WAT lipolysis is essential to provide fatty acid (FA) fuels in  
74 the fasting state to sustain high respiration rates in BAT <sup>9,10</sup>.

75 Yet, recent studies indicate that  $\beta_3$ -adrenergic receptor is dispensable in brown and  
76 beige adipocyte for cold-induced transcriptional activation of thermogenic genes in mice <sup>11</sup>.  
77 Studies in mice lacking all three  $\beta$ -adrenergic receptors (so-called  $\beta$ -less mice) inferred the

78 existence of non-adrenergic signaling pathways contributing to brown/beige adipocyte  
79 recruitment and activation <sup>7,12</sup>. Studies over the past few years identified a variety of  
80 circulating factors and hormones that may control beige adipocyte development of which  
81 cardiac natriuretic peptides (NP) are of particular interest. NP control blood volume and  
82 pressure in mammals <sup>13</sup>, and were shown to be potent lipolytic hormones in human WAT  
83 (hWAT) <sup>14,15</sup>. Moreover, NP induce the transcription of *PGC1 $\alpha$*  and *UCP1* via cGMP-  
84 dependent protein kinase (PKG) *in vitro* in human adipocytes <sup>16</sup>. Chronic B-type NP (BNP)  
85 infusion in mice induces *Pgc1 $\alpha$*  and *Ucp1* in BAT and inguinal WAT (iWAT) <sup>16</sup>. However  
86 although NP induce a transcriptional thermogenic program in adipocytes, it is unclear if they  
87 are necessary and required for physiological activation of brown/beige adipocytes during  
88 acute cold exposure. Here, we show that cardiac atrial NP (ANP) is a physiological non-  
89 adrenergic activator of BAT thermogenesis through binding to its receptor guanylyl cyclase-A  
90 (GCA). We demonstrate that ANP is required for cold-induced activation of BAT  
91 thermogenesis and WAT lipolysis in mice. ANP deficiency also impairs liver triglycerides  
92 (TG) and glycogen metabolism thus contributing to reduced substrate availability to fuel BAT  
93 thermogenesis. We further show that ANP induces mitochondrial uncoupling and a  
94 thermogenic program in human primary brown adipocytes, while expression of its receptor  
95 GCA relates to a wide range of brown/beige markers and genes involved in oxidative  
96 metabolism in human subcutaneous abdominal fat. Thus, our findings identify ANP as a  
97 critical physiological endocrine regulator of non-shivering thermogenesis in mammals.

## 98 **Results**

### 99 **ANP is required for non-shivering thermogenesis during acute cold exposure**

100 [<sup>18</sup>F]fluorodeoxyglucose positron emission tomography-computed tomography (<sup>18</sup>F-FDG  
101 PET/CT) imaging indicate that acute cold exposure at 4°C for 5h induces the recruitment of  
102 several BAT depots in the neck (anterior cervical) and clavicular areas (clavicular, axillary,  
103 supraspinal, interscapular, infrascapular, anterior subcutaneous, ventral spinal and perirenal)  
104 in wild-type mice (**Fig. 1a** and **Supplementary Fig. 1a**). This is consistent with a recent  
105 study reporting similar recruitment of BAT depots in response to 7 days treatment with a β<sub>3</sub>-  
106 adrenergic agonist <sup>17</sup>. BAT activation upon cold exposure was associated with a 3-4 fold  
107 increase of cardiac *Nppa* (ANP) expression (**Fig. 1b**) and 2-fold increase of plasma ANP (**Fig.**  
108 **1c**), while no change of cardiac *Nppb* (BNP) expression (**Fig. 1d**) and plasma BNP (**Fig. 1e**)  
109 were observed. Thus, this demonstrates that ANP rather than BNP behaves as a physiological  
110 endocrine ligand of GCA in response to cold stress. Cold exposure increases blood pressure  
111 and cardiac filling pressure, which are the main physiological stimuli of cardiac ANP  
112 secretion <sup>18</sup>.

113 To delineate the role of ANP in non-shivering thermogenesis, we next challenged  
114 ANP null mice (*Nppa*<sup>-/-</sup>) at 4°C. *Nppa*<sup>-/-</sup> mice had no detectable cardiac *Nppa* expression  
115 (**Supplementary Fig. 1b**) and no functional compensation by either cardiac *Nppb*  
116 expression (**Supplementary Fig. 1c**) nor plasma BNP (**Supplementary Fig. 1d**) upon cold  
117 exposure. ANP deficiency was associated with the development of cardiac hypertrophy as  
118 shown by the increased heart weight to body weight ratio (**Supplementary Fig. 1e**) and left  
119 ventricular mass (**Supplementary Fig. 1f**). Since an intact cardiac function is required for  
120 functional non-shivering thermogenesis upon acute cold exposure <sup>9</sup>, we show here that  
121 cardiac hypertrophy in *Nppa*<sup>-/-</sup> mice does not alter systolic function since left ventricular  
122 ejection fraction remains comparable to wild-type littermates (*Nppa*<sup>+/+</sup>) (**Supplementary**

123 **Fig. 1g).** *Nppa*<sup>-/-</sup> mice had normal rectal temperature at room temperature (RT, 21°C) (**Fig.**  
124 **1f)** and at thermoneutrality (30°C) (**Supplementary Fig. 1h)** compared with their wild-type  
125 littermates but became cold intolerant upon acute cold exposure (**Fig. 1g**). Since BAT is the  
126 main site of non-shivering thermogenesis, we measured BAT activity and recruitment by <sup>18</sup>F-  
127 FDG PET/CT in *Nppa*<sup>+/+</sup> and *Nppa*<sup>-/-</sup> mice at RT and 4°C (**Fig. 1h**). Acute cold remarkably  
128 increased BAT activity and volume, while cold-induced BAT activity (5.9 vs. 12.7 fold,  
129  $p < 0.01$ ) (**Fig. 1i**) and volume (**Fig. 1j**) (4.8 vs. 9.7 fold,  $p < 0.05$ ) were both severely blunted in  
130 *Nppa*<sup>-/-</sup> vs. *Nppa*<sup>+/+</sup> mice. This effect may be ascribed to the lack of ANP since expression  
131 level of genes involved in ANP signaling such as *Gca*, NP clearance receptor (*Nprc*) and  
132 cGMP-dependent protein kinase (*Prkg1*) was comparable in BAT of *Nppa*<sup>-/-</sup> and *Nppa*<sup>+/+</sup>  
133 mice (**Supplementary Fig. 1i**). Fractional <sup>18</sup>F-FDG uptake by the hind limb muscle  
134 quadriceps was reduced in *Nppa*<sup>-/-</sup> mice at 21°C, and very low at 4°C (<1% of BAT) but  
135 remained unchanged between both genotypes (**Fig. 1k**). Since  $\beta$ -adernergic receptors <sup>12</sup>  
136 (**Supplementary Fig. 1j, k, l**) and adenosin receptors <sup>19</sup> (**Supplementary Fig. 1m, n**) have  
137 been linked to BAT thermogenesis, we measured their gene expression levels and did not find  
138 significant changes between genotypes. Altogether, ANP deficiency severely blunts  
139 physiological BAT activation and recruitment.

140

#### 141 **ANP-deficiency induces BAT morphological and molecular changes**

142 Histological analysis of BAT morphology revealed the presence and accumulation of multiple  
143 and large lipid droplets in *Nppa*<sup>-/-</sup> compared with *Nppa*<sup>+/+</sup> mice after cold exposure (**Fig.**  
144 **2a**). The BAT morphology of *Nppa*<sup>-/-</sup> mice at 4°C resembles the one observed at  
145 thermoneutral temperature (30°C) in both genotypes (**Supplementary Fig. 2a**) which is  
146 characteristic of a dysfunctional BAT. Since BAT is a highly vascularized tissue <sup>2</sup> and GCA  
147 activation can modulate angiogenesis in some vascular beds <sup>20</sup>, we next investigated BAT

148 vascularization through lectin staining. No visual difference in BAT capillary density was  
149 observed between *Nppa*<sup>-/-</sup> and *Nppa*<sup>+/+</sup> (**Supplementary Fig. 2b**). Compared to what is  
150 observed after 4°C exposure, no visual difference in BAT morphology (**Supplementary Fig.**  
151 **2a**) and expression levels of thermogenic genes (**Supplementary Fig. 2c**) were noted at RT  
152 between *Nppa*<sup>-/-</sup> and *Nppa*<sup>+/+</sup> mice. In contrast, cold-induced *Ucp1* (**Fig. 2b**) and *Pgc1α*  
153 (**Fig. 2c**) gene expression was severely blunted in *Nppa*<sup>-/-</sup> mice. We further confirmed a  
154 significant reduction of UCP1 protein content in interscapular BAT (iBAT) at 4°C in *Nppa*<sup>-/-</sup>  
155 mice (**Fig. 2d**). Consistent with an impaired cold-induced BAT activation, we observed a  
156 blunted cold-mediated response of two canonical PPAR-target genes<sup>21,22</sup>, e.g. carnitine  
157 palmitoyl transferase-1B (*Cpt1b*) (**Fig. 2e**) and perilipin 2 (*Plin2*) (**Fig. 2f**) in *Nppa*<sup>-/-</sup> mice.  
158 Previous work has shown that PGC1α, once induced by acute cold, co-activates PPARγ, a  
159 crucial nuclear receptor orchestrating the transcriptional program for substrate oxidation and  
160 thermogenesis in BAT<sup>23</sup>. Brown fat lipid accumulation in *Nppa*<sup>-/-</sup> mice seems to occur  
161 independently of changes in NEFA transport through *Cd36* (**Fig. 2g**) and lipoprotein lipase  
162 (*Lpl*) (**Fig. 2h**) gene expression which were similarly induced by cold exposure in both  
163 genotypes. In the same line, no change in protein content of the rate-limiting enzymes ATGL  
164 (**Fig. 2i**) and HSL (**Fig. 2j**), as well as *de novo* lipogenesis genes such as carbohydrate  
165 responsive-element binding protein-β (*Chrebpβ*), acetyl-coA carboxylase 1 (*Acc1*) and fatty  
166 acid synthase (*Fas*) (**Supplementary Fig. 2d, e, f**) were noted in *Nppa*<sup>-/-</sup> versus wild-type  
167 control. Reduced cold-induced BAT activation and glucose uptake were associated with a  
168 significant increase of cold-induced *Glut1* expression (**Supplementary Fig. 2g**) while no  
169 change in *Glut4* (**Supplementary Fig. 2h**) were observed in *Nppa*<sup>-/-</sup> mice.

170 Collectively, ANP deficiency causes marked morphological and cellular alterations of  
171 BAT biology and impairs cold-induced thermogenic genes activation which seems  
172 independent of changes in FA uptake and TG hydrolysis.



173

#### 174 **ANP is required for beige adipocyte recruitment during acute cold exposure**

175 Previous studies have shown that the ratio of GCA-to-NPRC expression determines cardiac  
176 NP biological activity in human and mice adipose tissue (AT)<sup>24-27</sup>. Thus, genetic ablation of  
177 adipose NPRC increases NP signaling through GCA in mice<sup>22</sup>. Here, we show that acute cold  
178 exposure induces WAT changes in NP receptor expression compared to mice housed at  
179 thermoneutral temperature, in a depot-specific manner. Acute cold exposure up-regulated the  
180 ratio of GCA-to-NPRC mRNA (**Supplementary Fig. 3a and Supplementary Fig. 3b**) and  
181 protein expression (**Fig. 3a**) in the three WAT depots tested. As previously described<sup>16</sup>, we  
182 noted that NPRC protein was significantly diminished in iWAT (**Fig. 3b and Supplementary**  
183 **Fig. 3c**), while GCA protein remained unchanged (**Fig. 3b and Supplementary Fig. 3d**).  
184 Conversely, acute cold exposure up-regulated GCA protein expression specifically in  
185 epididymal WAT (eWAT) (**Fig. 3c and Supplementary Fig. 3d**) and retroperitoneal WAT  
186 (rpWAT) (**Fig. 3d**), while NPRC remained unaffected (**Figs. 3c, 3d and Supplementary Fig.**  
187 **3c**). Of interest, increased *Gca* gene expression was also observed in primary mouse  
188 adipocytes exposed to cold in culture (31°C) (**Supplementary Fig. 3e**) while *Nprc* remained  
189 unchanged (**Supplementary Fig. 3f**), demonstrating a cell-autonomous increase of the GCA-  
190 to-NPRC ratio in cold-exposed white adipocytes (**Supplementary Fig. 3g**). Cold-induced up-  
191 regulation of GCA-to-NPRC ratio coincided with a sharp increase of p38 MAPK  
192 phosphorylation (**Fig. 3d**), and robust induction of its downstream transcriptional targets  
193 UCP1 and PGC1 $\alpha$  in iWAT (**Supplementary Fig. 3h**), eWAT (**Supplementary Fig. 3i**),  
194 rpWAT (**Supplementary Fig. 3j**), and iBAT (**Supplementary Fig. 3k**). The induction of  
195 beige adipocytes in WAT, the so-called browning/beige-ing process, is highly adipose depot  
196 dependent in mice<sup>28,29</sup>. The iWAT and rpWAT undergo the most profound induction of  
197 UCP1 (>30 fold) whereas the eWAT exhibit a weak response (<10 fold). Cold-induced

198 transcriptional activation of thermogenic genes was suppressed by ~40% in iWAT (**Fig. 3e**)  
199 and eWAT (**Fig. 3f**), and severely impaired in rpWAT (**Fig. 3g**) of ANP null mice compared  
200 to wild type mice. The GCA-to-NPRC mRNA ratio was robustly induced in all WAT depots  
201 with a more pronounced induction in rpWAT (~24 fold) compared to iWAT (~1.75 fold) and  
202 eWAT (~2.25 fold) upon cold exposure (**Supplementary Fig. 3b**). Moreover, rpWAT is  
203 sensitive to browning<sup>30</sup> and anatomically close to the kidneys, one main physiological site of  
204 action of ANP<sup>13</sup>. Thus, our data show that ANP-mediated browning is WAT depot dependent  
205 with rpWAT being the most responsive depot. Along with PGC1 $\alpha$  and UCP1, we observed a  
206 significant reduction of PR domain containing 16 (PRDM16) mRNA levels. The thermogenic  
207 activity of brown and beige adipocytes is conferred by a core gene program controlled by the  
208 master transcriptional regulator PRDM16 shown to physically interact with PGC1 $\alpha$  to  
209 transactivate UCP1 transcription<sup>31</sup>. Consistent with cold-induced thermogenic gene  
210 expression, wild-type mice exposed to acute cold showed augmented iWAT browning  
211 compared to mice housed at thermoneutrality as evidenced by increased emergence of smaller  
212 adipocytes containing multilocular lipid droplets and Hematoxylin/Eosin (H&E) staining, a  
213 physiological response that was suppressed in ANP null mice (**Fig. 3h**). Similarly to BAT, we  
214 did not find significant changes in the level of expression of cold-regulated genes involved in  
215 the control of beige adipocyte thermogenesis such as  *$\beta$ 1ar* (**Supplementary Fig. 3l**),  *$\beta$ 2ar*  
216 (**Supplementary Fig. 3m**),  *$\beta$ 3ar* (**Supplementary Fig. 3n**) and *Serca2b*<sup>10</sup> (**Supplementary**  
217 **Fig. 3o**). No major change in genes involved in NP signaling and thermogenesis was  
218 observed in iWAT (**Supplementary Figs. 4a and 4b**) and eWAT (**Supplementary Figs. 4c**  
219 **and 4d**) at 30°C and 21°C between genotypes. No visual histomorphological differences in  
220 iWAT, eWAT and rpWAT were noted at thermoneutrality (**Supplementary Fig. 4e**) and RT  
221 (**Supplementary Fig. 4f**) between *Nppa*<sup>+/+</sup> and *Nppa*<sup>-/-</sup> mice. Overall, our data emphasizes

222 that upon a physiological cold stress, cardiac ANP released significantly contributes to  
223 thermogenic adipocytes activation and WAT browning.

224

### 225 **ANP is required for white adipocyte lipolysis during acute cold exposure**

226 Since acute exposure to 4°C up-regulates the ratio of GCA-to-NPRC protein in WAT, we  
227 hypothesized that white adipocytes would become sensitive to ANP-induced lipolysis in cold  
228 conditions. Former studies indicated that murine adipocytes are resistant to the lipolytic effect  
229 of ANP<sup>32</sup>, while genetic ablation of NPRC in mice restores a lipolytic effect of ANP<sup>16</sup>. Here  
230 we demonstrate that acute cold-exposure renders white adipocytes fully responsive to ANP-  
231 mediated lipolysis, whereas in mice housed at thermoneutral temperature ANP shows no  
232 lipolytic effect as previously observed. Acute cold exposure increased ANP-mediated  
233 glycerol (**Fig. 3i**) and NEFA (**Supplementary Fig. 3g**) release by 2-3 fold compared to basal  
234 conditions in adipocytes isolated from eWAT, while the effect of isoproterenol remained  
235 unchanged compared to thermoneutral temperature. The cold-mediated *ex vivo* WAT lipolytic  
236 capacity was comparable between wild-type and ANP null mice (**Fig. 3i**). This is in  
237 agreement with the lack of change of GCA (**Supplementary Fig. 4h**) and NPRC  
238 (**Supplementary Fig. 4i**) protein expression in eWAT of ANP null versus wild-type mice,  
239 indicating no functional compensation. However, cold-exposed ANP null mice had a  
240 significant down-regulation of HSL phosphorylation at Ser-660 and Ser-563 in eWAT (**Fig.**  
241 **3j**), two main activating sites targeted by both PKA and PKG in response to catecholamines  
242 and ANP stimulation<sup>33</sup>. This suggests that the lack of ANP *in vivo* associates with a lower  
243 cold-induced activation of HSL in eWAT of ANP null mice. This translated into a severely  
244 defective cold-induced lipolysis in ANP knockout mice as reflected by the changes in plasma  
245 glycerol concentrations between thermoneutral temperature and acute cold (**Fig. 3k**). Recent  
246 studies challenged the established view that intracellular lipolysis of lipid droplets inside BAT

247 is rate-limiting for non-shivering thermogenesis. Rather, these studies showed that WAT  
248 lipolysis is essential to fuel BAT with FA for heat production during fasting<sup>9,10</sup>. Together,  
249 this suggests that the blunted cold-induced lipolytic response could contribute to the observed  
250 defective BAT activity and thermogenesis of ANP null mice. Altogether our data stress that  
251 physiological release of ANP during cold exposure induces lipolysis to fuel BAT  
252 thermogenesis.

253

### 254 **ANP deficiency impairs plasma triglycerides and glucose responses to cold**

255 Previous work suggested that, besides NEFA, circulating TG and glucose are major substrates  
256 for BAT thermogenesis<sup>6</sup>. In this study, we found reduced blood glucose levels upon cold  
257 exposure after 2h (**Supplementary Fig. 5a**), while observing a time-dependent reduction of  
258 circulating insulin (**Supplementary Fig. 5b**) and circulating TG levels (**Supplementary Fig.**  
259 **5c**) during a time-course of cold exposure. We further observed decreased levels of  
260 circulating TG (**Fig. 4a**) and a blunted cold-induced plasma clearance of circulating TG in  
261 *Nppa*<sup>-/-</sup> mice (**Fig. 4b**). This occurred despite no significant difference in liver TG content  
262 between genotypes (**Fig. 4c, d**). Lipolysis-derived NEFA availability is a major determinant  
263 of liver TG production<sup>34</sup>. In line with a recent study<sup>9</sup>, hepatic genes related to lipid  
264 metabolism were strongly altered during cold exposure (**Fig. 4e, f** and **Supplementary Fig.**  
265 **5d, g**). Cold suppressed *Cd36* (**Fig. 4e**) and *Ppara* (**Supplementary Fig. 5d**) mRNA levels,  
266 while briskly inducing *Ppargc1a* (**Supplementary Fig. 5e**), *Atgl* (**Supplementary Fig. 5f**)  
267 and *Fgf21* (**Supplementary Fig. 5g**). Of interest, altered lipolysis in ANP-deficient mice was  
268 associated with a compensatory increase of liver *Cd36* gene expression (**Fig. 4e**), while both  
269 liver *Cpt1a* mRNA levels (**Fig. 4f**) and plasma ketone bodies levels (**Fig. 4g**) were  
270 significantly reduced in *Nppa*<sup>-/-</sup> mice. This reveals a blunted NEFA utilization in the liver of  
271 ANP-deficient mice. In mirror of cold-induced NEFA utilization in liver, we observed a

272 suppressed expression of *de novo* lipogenesis genes such as *Chrebp* (**Supplementary Fig.**  
273 **5h**), *Acly* (**Supplementary Fig. 5i**), *Elovl3* (**Supplementary Fig. 5j**), and *Fas*  
274 (**Supplementary Fig. 5k**) that was similar in control and ANP deficient mice.

275 Because lipolysis-derived NEFA availability is also a strong determinant of  
276 endogenous glucose production in mice <sup>35</sup>, we investigated glucose metabolism in cold-  
277 exposed mice. Remarkably, ANP null mice were not able to maintain their blood glucose  
278 levels in a normal physiological range (**Fig. 4h**). This phenomenon was independent of  
279 changes in glucose-6-phosphatase (*G6pase*) (**Fig. 4i**) and phosphoenolpyruvate carboxy-  
280 kinase-1 (*Pck1*) (**Fig. 4j**) mRNA levels, protein content (**Fig. 4k, l**) and G6Pase activity (**Fig.**  
281 **4m**) in liver of ANP KO mice versus control. Importantly, we observed a strong liver  
282 glycogen depletion upon acute cold exposure (~70%) in control mice, while cold-induced  
283 glycogen depletion was strongly blunted in *Nppa*<sup>-/-</sup> mice (**Fig. 4n**), thus coinciding with the  
284 inability to maintain normal blood glucose levels during cold exposure. In summary, our data  
285 together indicate that ANP deficiency impairs liver TG and glycogen metabolism thus  
286 contributing to reduced substrate availability to fuel BAT thermogenesis.

287

### 288 **Cold induces ANP and GC-A is associated with brown/beige thermogenic markers in** 289 **human subcutaneous abdominal WAT in humans**

290 To further examine if ANP could play a role in cold-induced activation of BAT in humans,  
291 we determined circulating plasma NP levels in human volunteers exposed to mild cold. Thus,  
292 recent studies using <sup>18</sup>F-FDG PET/CT revealed that acute cold exposure readily activates  
293 BAT in humans <sup>36,37</sup>, however the physiological cues orchestrating hBAT activation are still  
294 unclear. In a study in which 1h cold exposure at 16°C increased mean blood pressure, BAT  
295 activity and systemic lipolysis in lean healthy male volunteers (**Fig. 5a**) <sup>38</sup>, we measured a  
296 significant increase of plasma ANP levels by 1.7 fold (**Fig. 5b**) whereas plasma BNP

297 concentrations remained strictly unchanged (**Fig. 5c**). In light of the previous findings in  
298 human primary BAT-derived adipocytes, this suggests that ANP is a cold-induced endocrine  
299 activator of BAT function in humans. Thus in agreement with mice data, this implies that  
300 ANP behaves as the physiological endocrine ligand of GCA in response to cold stress in  
301 humans.

302         There is a large variability of white fat browning/beige-ing in human individuals  
303 particularly those with obesity<sup>24</sup>. We next investigated the relationship between mRNA levels  
304 of GCA and markers of browning/beige-ing in subcutaneous abdominal adipose tissue in a  
305 cohort of middle-aged individuals with a wide range of body mass index selected for a high  
306 baseline expression of UCP1 (n=79). Correlation matrix analysis revealed that GCA was  
307 highly correlated with previously reported brown/beige-specific markers involved in  
308 mitochondrial oxidative metabolism, mitochondrial biogenesis, glucose and FA metabolism<sup>24</sup>  
309 (**Fig. 5d**). An optimal re-ordering of the correlation matrix based on hierarchical clustering  
310 revealed that *GCA* clustered with several brown/beige-specific gene markers such as *PPAR $\alpha$* ,  
311 Sirtuin 3 (*SIRT3*), Carbonic Anhydrase 4 (*CA4*), Forkhead Box K2 (*FOXK2*) and PPAR $\gamma$  co-  
312 activator 1 $\beta$  (*PPARGC1B*) (dotted line box **Fig. 5d**). The top-ranking genes displaying the  
313 highest correlations with *GCA* were the beige-specific marker *CA4* (**Fig. 5e**), the lipid droplet-  
314 associated protein Perilipin 5 (*PLIN5*) (**Fig. 5f**), the transcription factor *PPAR $\alpha$*  (**Fig. 5g**), and  
315 the brown-specific mitochondrial *SIRT3* (**Fig. 5h**), all genes highly expressed in BAT and  
316 involved in metabolic pathways supporting thermogenic function<sup>24</sup>. Thus correlations  
317 between *GCA* and brown/beige-specific markers support a role for ANP/GCA signaling in  
318 *bona fide* thermogenic adipocytes of human subcutaneous abdominal WAT.

319

320 **ANP activates mitochondrial uncoupling in BAT and a thermogenic program in human**  
321 **primary brown/beige and white adipocytes**

322 <sup>18</sup>F-FDG PET/CT revealed the existence of active BAT in the supraclavicular and neck areas  
323 of adult humans, that can be readily activated by cold exposure <sup>36,39-41</sup>. It was suggested that  
324 these human BAT (hBAT) depots are in fact composed of UCP1-positive adipocytes bearing  
325 a transcriptional signature of beige rather than brown adipocytes as found in rodents <sup>5</sup>  
326 . Here we differentiated adipocytes derived from hBAT (prevertebral) or human WAT  
327 (hWAT) (neck) *in vitro* from the same subject using four independent donors as previously  
328 described <sup>5,42</sup>. mRNA expression levels of *UCP1*, *PRDM16*, Cell Death-Inducing DFFA-Like  
329 Effector A (*CIDEA*) and Nuclear respiratory factor 1 (*NRF1*) were significantly higher in  
330 brown/beige compared to white adipocytes (**Supplementary Fig. 6a**). Thus, we also observed  
331 a higher gene expression level of the NP-signaling components *NPRC*, *PRKGI* and  
332 Phosphodiesterase 5A (*PDE5A*) in BAT biopsy-derived adipocytes (**Supplementary Fig.**  
333 **6b**). We next measured mitochondrial oxygen consumption under ATP synthase inhibition by  
334 oligomycin treatment to focus on mitochondrial uncoupled respiration (state 4). We have  
335 previously shown that  $\beta$ -adrenergic stimulation leads to pronounced mitochondrial  
336 uncoupling in human primary brown/beige adipocytes which is markedly less in human  
337 primary white adipocytes, illustrating the unique feature of human adipocytes derived from  
338 the neck region <sup>42</sup>. Interestingly, we here show that ANP dose-dependently activates  
339 uncoupled mitochondrial respiration to about 50% of the effect of norepinephrine (NE) in  
340 human brown/beige adipocytes (**Fig. 6a, b**). This effect was markedly lower in WAT-derived  
341 adipocytes (**Fig. 6c, d**). ANP at the lowest dose of 100 nM nearly doubled maximal  
342 uncoupled respiration measured under carbonilcyanide p-triflouromethoxyphenylhydrazone  
343 (FCCP) in human brown/beige adipocytes (**Fig. 6e**). A similar but weaker effect was observed  
344 in hWAT adipocytes (**Fig. 6f**). This reveals that ANP can directly activate mitochondrial  
345 uncoupling and respiration in human primary brown/beige adipocytes. We next examined if  
346 ANP could induce a transcriptional thermogenic program in human brown/beige and white

347 primary adipocytes as observed *in vivo* in mice. ANP treatment briskly increased mRNA  
348 levels of *UCPI* both in human WAT and BAT adipocytes (**Supplementary Fig. 6c**). A peak  
349 was observed after 3h treatment with levels returning to baseline after 48h and 72h treatment  
350 for *UCPI* and *CPT1B* in human brown/beige adipocytes (**Supplementary Fig. 6d, e**) and  
351 white (**Supplementary Fig. 6f, g**) adipocytes. Interestingly, acute treatment (3h) with ANP at  
352 100 nM increased to a variable degree (from 1.5 to 50-fold) a number of brown markers such  
353 as *UCPI* and deiodinase type 2 (*DIO2*), beige markers such as Cbp/P300 Interacting  
354 Transactivator With Glu/Asp Rich Carboxy-Terminal Domain 1 (*CITED1*) and Elongation Of  
355 Very Long Chain Fatty Acids Protein 3 (*ELOVL3*), and mitochondrial oxidative metabolism  
356 markers *CPT1B*, NADH:Ubiquinone Oxidoreductase Subunit B6 (*NDUFB6*) and  
357 Transcription Factor A, Mitochondrial (*TFAM*) in brown/beige adipocytes (**Fig. 6g**) and white  
358 adipocytes (**Fig. 6h**). Taken together, these results indicate that ANP has the capacity to  
359 activate a thermogenic program in human primary brown/beige and white adipocytes, and  
360 mitochondrial uncoupling in brown/beige adipocytes. This implies that ANP mimetics and/or  
361 pharmacological compounds able to increase ANP/GCA-signaling may be attractive  
362 strategies to activate BAT in humans.



## 363 Discussion

364 The current classical view in mammals is that brown/beige fat is primarily activated  
365 by norepinephrine released from sympathetic nerves upon cold exposure. However, the fact  
366 that the non selective  $\beta$ -agonist isoproterenol fails to activate BAT in humans<sup>43</sup> combined to  
367 the observation that  $\beta_3$ -adrenergic receptor is dispensable for cold-induced thermogenic gene  
368 activation in mice<sup>11</sup>, points toward the existence of alternative non-adrenergic regulatory  
369 systems that control BAT activation and function in response to cold. We here show that  
370 ANP, a cardiac hormone controlling blood volume and pressure, is necessary and required for  
371 cold-induced brown/beige adipocyte activation (Fig. 7). We further show that ANP is  
372 physiologically released upon cold exposure and activates mitochondrial uncoupling and a  
373 thermogenic program in human brown/beige adipocytes.

374 Previous work demonstrated that ANP contributes to cold-induced diuresis in healthy  
375 humans<sup>44</sup>. In response to cold, contraction of superficial blood vessels will limit heat loss,  
376 and as a consequence, blood will be shunted away toward deeper large blood vessels that will  
377 increase cardiac filling pressure of the right atrium, *i.e.* increased cardiac preload. As a result,  
378 ANP secretion will be induced to normalize the increase in cardiac preload by enhancing  
379 diuresis. Herein, we demonstrate that ANP released upon cold exposure, but not BNP, will  
380 activate BAT to produce heat and maintain euthermia. BNP, the product of *Nppb*, is  
381 marginally expressed in the right atria of the heart compared to ANP<sup>13</sup>. This likely explains  
382 why cardiac BNP expression and circulating levels are poorly affected by changes in cardiac  
383 filling pressure such as induced by cold exposure in this study.

384 In previous studies, the complete lack of all three  $\beta$ -adrenergic receptor ( $\beta$ -less mice)  
385<sup>12</sup> or sympathetic innervations in WAT through pharmacological ablation by 6-  
386 hydroxydopamine<sup>45</sup> or genetic invalidation of tyrosine kinase receptor-A<sup>7</sup> was shown to  
387 suppress partially but not completely cold-induced UCP1 expression. Although  $\beta$ -less mice

388 develop hypothermia, it is still unclear to what extent BAT activity is hampered by the lack of  
389  $\beta$ -adrenergic receptors. In this study, we show for the first time using  $^{18}\text{F}$ -FDG PET/CT that  
390 the lack of ANP abrogates about half of BAT activity and >60% of transcriptional activation  
391 of *Ucp1* and *Pgc1 $\alpha$*  in BAT in response to acute cold exposure. The accumulation of multiple  
392 lipid droplets in cold-exposed BAT, *i.e.* BAT steatosis, of ANP null mice is a sign of  
393 dysfunctional BAT as observed in other mouse models<sup>9,12,31</sup>. A failure to adequately activate  
394 BAT and UCP1 in ANP-deficient mice will lead to fat storage within lipid droplets in face of  
395 increased FA supply. This phenomenon is not observed at room temperature for which the  
396 cold stress represents a too moderate challenge to unmask prototypical BAT-related  
397 phenotypes.

398         Recent studies indicate that BAT activation upon cold exposure is intimately linked to  
399 WAT lipolysis in fasted mice<sup>9,10</sup>, thus highlighting the need for a thermogenic factor to  
400 activate lipolysis. Although ANP is a powerful lipolytic hormone in human adipocytes,  
401 previous studies could not reveal a lipolytic effect of ANP in mouse adipocytes<sup>32</sup>. We here  
402 reconcile these studies demonstrating that cold exposure briskly increases ANP receptor GCA  
403 gene and protein expression in WAT, thus rendering mouse adipocytes responsive to ANP-  
404 mediated lipolysis. Importantly, we here demonstrate a cell-autonomous up-regulation of  
405 GCA in primary mouse WAT adipocytes cultured at 31°C instead of 37°C. This indicates that  
406 acute cold is sufficient to up-regulate GCA expression in white adipocytes independently of  
407 systemic neuro-endocrine factors. We next show that cold-induced systemic lipolysis,  
408 reflected by increased plasma glycerol levels, and HSL activation by phosphorylation in  
409 eWAT is blunted in ANP null mice.

410         Besides NEFA derived from WAT lipolysis, circulating TG have been shown as major  
411 BAT substrates during cold exposure<sup>6</sup>. We here unravel a strong defect in plasma TG  
412 clearance in *Nppa*<sup>-/-</sup> mice during cold exposure despite a robust induction of *Lpl* in BAT of

413 cold-exposed *Nppa*<sup>-/-</sup> mice similar to control littermates. In line with a recent study<sup>9</sup>, we  
414 observed drastic changes in expression of lipid metabolism genes in liver of cold-exposed  
415 mice. Cold exposure turns on FA oxidative gene networks while down-regulating lipid  
416 synthesis gene programs such as *de novo* lipogenesis. This leads to substantial FA utilization  
417 by the liver thus producing ketone bodies. Remarkably, cold-induced up-regulation of *Cpt1a*,  
418 a rate-limiting enzyme in mitochondrial FA oxidation, and ketone bodies production was  
419 impaired in *Nppa*<sup>-/-</sup> mice. This together with a reduced cold-induced lipolysis in *Nppa*<sup>-/-</sup>  
420 mice largely contributes to this observed hepatic phenotype.

421 Previous works also highlighted that glucose is an important substrate for BAT during  
422 cold exposure in mice<sup>6</sup> and humans<sup>46</sup>. Of importance, we observed that *Nppa*<sup>-/-</sup> mice fail to  
423 maintain their blood glucose levels during acute cold exposure when compared to wild-type  
424 mice. This effect appears independent of changes in protein content and enzyme activity of  
425 PEPCCK and G6Pase that are rate-limiting enzymes in hepatic glucose production. Thus this  
426 could be reasonably explained by a reduced glycogenolysis during cold exposure due to  
427 reduced liver glycogen content in *Nppa*<sup>-/-</sup> mice. In addition, a blunted ANP-mediated  
428 lipolysis in WAT during cold exposure reduces NEFA availability and therefore liver  
429 endogenous glucose production<sup>35</sup>. Our findings are consistent with a previous work which  
430 showed a stimulatory effect of ANP on gluconeogenesis in perfused rat livers<sup>47</sup>. Thus the  
431 absence of ANP will likely result in blunted gluconeogenesis in cold-exposed mice.  
432 Collectively, a reduced availability and utilization of circulating NEFA, TG and glucose  
433 largely contributes to impaired BAT thermogenesis in cold-exposed *Nppa*<sup>-/-</sup> mice.

434 In summary, we identify cardiac ANP as a physiological endocrine activator of non-  
435 shivering thermogenesis in mammals. These data uncover an intriguing evolutionary  
436 interconnection between cardiac activity and non-shivering thermogenesis. While the  
437 sympathetic nervous system remains the best-known mediator of cold-induced thermogenesis

438 and BAT recruitment in mammals, our findings shed light on alternative pathways that have  
439 been conserved across species to maintain euthermia. They may open the path to novel  
440 pharmacological strategies targeted to enhance ANP/GCA signaling for human BAT  
441 recruitment to improve metabolic profile in individuals with obesity and type 2 diabetes.

442 **Methods**

443 **Clinical studies and human subjects**

444 *Study 1*

445 Ancillary study of the DiOGenes (Diet, Obesity and Genes) European Framework project  
446 (NCT00390637). For a thorough description of the overall objective and goals of this  
447 multicenter, randomized, controlled dietary intervention study, see <sup>48</sup>. Briefly, the study  
448 examined the effects of dietary macronutrients on weight regain and cardiovascular risk  
449 factors. Inclusion and exclusion criteria for study participation were previously outlined <sup>48</sup>.  
450 The DiOGenes study included 938 participants aged 27-63 years from 8 European countries;  
451 however, the present study used only a subgroup of 79 men and women who had high or  
452 medium *UCPI* gene expression in subcutaneous white adipose tissue as previously described  
453 <sup>24</sup> and *GCA* expression data available. Only baseline data were used in the present  
454 investigation.

455

456 *Study 2*

457 To investigate the effect of acute cold on circulating NP levels, each subject underwent a mild  
458 cold experiment. This experiment started with one-hour baseline measurements during  
459 thermoneutral conditions. Subsequently, subjects were exposed to one hour of mild cold  
460 exposure, in which a standardized cooling protocol was used. The mild cold experiment was  
461 conducted in a specially equipped air-permeable tent (Colorado altitude training, USA), in  
462 which ambient temperature could be tightly controlled. During baseline and the mild cold  
463 period, subjects wore standardized clothing (shorts and a t-shirt; 0.19 clo). Energy  
464 expenditure was continuously measured while body temperatures, skin perfusion  
465 (vasoconstriction) and heart rate were sampled each minute. Blood pressure was measured  
466 each 15 minutes as well as thermal comfort and thermal sensation via Visual Analog Scales

467 (VAS). These data have been reported previously<sup>38</sup>. Muscle shivering was monitored by  
468 means of EMG and VAS scales. Venous blood samples were taken during baseline and one  
469 hour after the onset of cold exposure.

470

#### 471 **Mouse models and handling**

472 Eight weeks old *Nppa*<sup>-/-</sup> male mice (B6.129P2-*Nppa*<sup>tm1Unc</sup>/J mice were backcrossed to  
473 C57BL/6J mice for at least ten generations) and their littermate control *Nppa*<sup>+/+</sup> were used.  
474 Mice were fed with a normal chow diet (Ssniff) and were housed in a pathogen-free barrier  
475 facility (12h light/dark cycle) with *ad libitum* access to water and food in standard animal care  
476 facility rooms at 21°C (RT). For cold exposure experiments, at 7 a.m. animals were placed  
477 singly and exposed for 5 hours at 4°C with water access but without food. For acclimation to  
478 thermoneutrality, mice were transferred to a chamber with controlled ambient temperature at  
479 30°C for 4 consecutive weeks. Rectal temperature was monitored using an EcoScan Temp4/5/  
480 thermometer (Eutech Instruments) each hour during cold exposure or at indicated time points.  
481 At the end of the protocol, mice were decapitated and blood was collected into EDTA tubes  
482 containing protease inhibitors. Organs and tissues were rapidly excised and either snap frozen  
483 in liquid nitrogen before being stored at -80°C or processed for histology. All experimental  
484 procedures were approved by our institutional animal care and use committee CEEA122  
485 (protocol# 2016122311033178) and performed according to INSERM guidelines for the care  
486 and use of laboratory animals.

487

#### 488 **Human primary adipocytes culture**

489 Adipocytes derived from human BAT and WAT were obtained and differentiated as  
490 described previously<sup>5,42</sup>. The study was reviewed and approved by the ethics committee of  
491 Maastricht University Medical Center (METC 10-3-012, NL31367.068.10, NCT03111719).

492 Informed consent was obtained before surgery. In brief, the stromal vascular fraction (SVF)  
493 was obtained from prevertebral BAT and subcutaneous WAT from the same area during  
494 thyroid surgery using a collagenase digestion. Differentiation was initiated for 7 days with  
495 differentiation medium containing biotin (33  $\mu$ M), pantothenate (17  $\mu$ M), insulin (100 nM),  
496 dexamethasone (100 nM), IBMX (250  $\mu$ M), rosiglitazone (5  $\mu$ M), T3 (2 nM), and transferrin  
497 (10  $\mu$ g/ml). Cells were transferred to maintenance medium consisting of biotin (33  $\mu$ M),  
498 pantothenate (17  $\mu$ M), insulin (100 nM), dexamethasone (10 nM), T3 (2 nM), and transferrin  
499 (10  $\mu$ g/ml) for another 5 days.

500

#### 501 **Mouse primary adipocytes culture**

502 SVF from iWAT was obtained from 6-week-old WT mice as previously described<sup>49</sup>. iWAT  
503 was dissected, mechanically dissociated and digested for 30min at 37°C with collagenase  
504 (collagenase NB 4 Standart Grade from Coger, concentration of 0.4 U/ml diluted in  
505 proliferative medium ( $\alpha$ MEM plus 0.25 U/ml amphotericin, 100 U/ml penicillin, 100 mg/ml  
506 streptomycin, 0.016 mM biotin, 100  $\mu$ M ascorbic acid, 0.018 mM pantothenic acid and 10%  
507 new-born calf serum)). After filtration, red blood cells lysis and centrifugation, the pellet was  
508 resuspended in proliferative medium. SVF cells were then counted, plated at 10000 cells/cm<sup>2</sup>  
509 and rinsed in PBS 3 hours after plating. Cells were maintained at 37°C (5% CO<sub>2</sub>) and re-fed  
510 every 48h. Adherent cells were grown to 80% confluency in proliferative medium. Cells were  
511 then exposed to an adipogenic cocktail (proliferative medium supplemented with 5  $\mu$ g/ml  
512 insulin, 2 ng/ml T3, 33.3 nM dexamethazone, 10  $\mu$ g/ml transferrin and 1  $\mu$ M rosiglitazone)  
513 and used after 8 days of differentiation.

514

#### 515 **Cellular cooling**

516 Fully differentiated inguinal mouse primary adipocytes were kept in a 37°C incubator with  
517 5% CO<sub>2</sub> before experiments. Before cooling treatment, medium was refreshed with  
518 prewarmed adipogenic cocktail. For cooling, culture plates were taken out from the home  
519 incubator (37°C) and immediately transferred to another incubator set at 31°C for 5 hours.

520

### 521 **Blood analyses**

522 Human and mouse plasma ANP and BNP were measured with Human Atrial Natriuretic  
523 Peptide ELISA kit (Cusabio) and Mouse Atrial Natriuretic Peptide ELISA kit (Cusabio),  
524 Human Brain Natriuretic Peptide ELISA kit (Cusabio), and Mouse Brain Natriuretic Peptide  
525 ELISA kit (Cusabio), respectively following manufactory instructions. Glycerol was  
526 measured by enzymatic assay (Free Glycerol reagent, Sigma), NEFA and TG were measured  
527 using the NEFA C kit (Wako) and TG reagent (sigma). Glucose and ketone bodies levels  
528 were measured using a glucometer (Accucheck; Roche, Meylan, France) and blood β-ketone  
529 bodies meter (Freestyle Optium H meter, Abbot) respectively.

530

### 531 **Echocardiography**

532 Echocardiography was carried out with a Vivid7 echograph (GE Healthcare) and a 14 MHz  
533 transducer (i13L, GE) on lightly anesthetized (1% isoflurane in air) mice placed on a heating  
534 pad. Left ventricular walls and cavity dimensions were obtained from parasternal short axis  
535 view at mid-ventricular level during Time Movement mode acquisition. LV mass was  
536 estimated by a spherical approximation. LV ejection fraction was measured from parasternal  
537 long axis view by delineating LV chamber area in diastole and systole. The operator was  
538 blind from mice genotype.

539

### 540 **<sup>18</sup>F-FDG PET/CT**



541 Positron emission tomography-computed tomography imaging with [<sup>18</sup>F]fluorodeoxyglucose  
542 (<sup>18</sup>F-FDG PET/CT) was performed as previously described <sup>50</sup>. Briefly, mice were placed  
543 singly in cages, with water but without food and bedding, for 4h fasting either at 4°C or RT  
544 before transfer to the imaging lab. Then mice were injected intraperitoneally with 10 to 14.5  
545 MBq of <sup>18</sup>F-FDG (GlucoTep® Cyclopharma, S<sup>t</sup>-Beauzire, France, #FDGTCPRECH) and  
546 placed back into their respective cage either kept on ice or remaining on a heating pad (RT)  
547 for 1h. After anesthesia with 4% isoflurane, mice were placed in 36°C imaging chambers for  
548 a 15 min PET acquisition (NanoScan PET/CT *Mediso Ltd, Hungary*) 1h post <sup>18</sup>F-FDG  
549 injection and for a 6 min CT scan imaging (720 projections, semi-circular scan method, X ray  
550 energy: 35kVp, exposure time: 450ms, voxel size: 251 x 251 x 251µm). PET acquisitions  
551 were performed in list-mode and reconstructed with a three-dimensional iterative algorithm  
552 (Tera-Tomo 3D, full detector model and low regularization; *Mediso Ltd, Hungary*) with four  
553 iterations and six subsets and a voxel size of 0.4 x 0.4 x 0.4 mm. All images were  
554 automatically corrected for radioactive decay during acquisition by the manufacturer software  
555 setting (Nucline, *Mediso Ltd, Hungary*). CT images were automatically fused to PET images  
556 and were also used for attenuation correction of PET images during their reconstruction. After  
557 acquisition, mice were placed back in clean cages with free access to food and water at RT.  
558 Processing of reconstructed images has been performed with VivoQuant software (InviCRO).  
559 3D volumes of interest (VOIs) were drawn manually on the CT (part of left quadriceps)  
560 giving access to muscle mean <sup>18</sup>F-FDG uptake (kBq.g<sup>-1</sup>) or, for BAT, by semi-automatic  
561 segmentation based on connected pixels threshold to calculate BAT <sup>18</sup>F-FDG uptake (kBq)  
562 and metabolic volume (mm<sup>3</sup>).

563

564 **Adipocyte lipolysis**

565 Fresh eWAT pads were dissected from mice and put into phosphate-buffered saline (PBS) at  
566 37°C. Adipose tissue depots were cut into small pieces and transferred into Krebs-Ringer  
567 bicarbonate buffer (pH 7.4) containing 0.5 mM CaCl<sub>2</sub>, 238 mg/100ml HEPES, 108 mg/100  
568 ml glucose, 3.5% BSA, and 1 mg/ml collagenase (Sigma) at 37°C for 20 min. At the end of  
569 digestion, the fat cell suspension was filtered and rinsed three-times. Isolated packed  
570 adipocytes were diluted to 1/10<sup>th</sup> and incubated in Krebs-Ringer bicarbonate for basal  
571 lipolysis determination and 1μM isoproterenol (Sigma,) or 1μM ANP (Sigma) for lipolysis  
572 determination. Incubations were carried out for 90 min at 37°C and then placed on ice to stop  
573 lipolysis. Glycerol was measured by enzymatic assay (Free Glycerol reagent, Sigma,) and  
574 NEFA were measured using the NEFA C kit (Wako).

575

## 576 **Histology**

577 Adipose tissues and liver were fixed with 4% paraformaldehyde in PBS, dehydrated,  
578 embedded in paraffin, and cut into 7μm sections. Sections were stained with hematoxylin and  
579 eosin using standard protocols.

580

## 581 **Immunofluorescence**

582 iBAT sections (300 μm) were incubated in blocking solution (2% normal horse serum and  
583 0.2% triton X-100 in PBS) for 4 hours at RT and then incubated with the lipid probe BODIPY  
584 558/568 C12 (1:1000) before nuclei being stained with DAPI (Sigma). iBAT sections were  
585 also incubated with lectin-rhodamine (1:250, Vector Laboratories) overnight at 4°C and  
586 nuclei stained with DAPI. Imaging was performed using a confocal Laser Scanning  
587 microscope (LSM 780, Carl Zeiss) and image analysis was performed using Fiji software  
588 (NIH).

589

590 **G6Pase activity**

591 Frozen tissues were homogenized using Fast Prep<sup>®</sup> in 10 mM HEPES and 0.25 M sucrose, pH  
592 7.4 (9 vol./g tissue). G6Pase activity was assayed in homogenates for 10 min at 30°C at pH  
593 7.3 in the presence of a saturating glucose-6-phosphate concentration (20 mM)<sup>51</sup>.

594

595 **Hepatic glycogen content**

596 Liver samples were weighed and homogenized in acetate buffer (0,2M, pH 4.8). After  
597 centrifuging the samples at 12 000g for 10min, supernatant was transferred into clean tubes  
598 and divided in two aliquots. An aliquot of each homogenate was mixed with  
599 amyloglucosidase (Sigma) and incubated at 55°C for 15 minutes. The other one was mixed  
600 with water and incubated at RT for 15 minutes. Glucose content was measured as previously  
601 described below. Samples were analyzed in duplicate and the results determined as µg  
602 glycogen per mg tissue.

603

604 **Hepatic triglycerides content**

605 Liver triglycerides were extracted using Folch extraction procedure, as previously described  
606 <sup>52</sup>. This procedure consist in the addition of a chloroform/methanol 2/1 solution to 100 mg of  
607 frozen liver (1.7mL for 100mg of tissue), and then a crushing with Fast Prep<sup>®</sup>. The solution  
608 was centrifuged twice (2,000g; 10 min; 4°C), and 2mL of NaCl was added to the supernatant  
609 previously removed. Two phases were created, and the inferior organic phase that contains  
610 triglycerides was kept. After chloroform evaporation, triglycerides were diluted in 100µL of  
611 propanol and measured with a colorimetric kit (DiaSys, Holzheim, Germany).

612

613 **SeaHorse**

614 For oxygen consumption measurements, differentiated adipocytes were incubated for 1 h at  
615 37°C in unbuffered XF assay medium supplemented with 2 mM GlutaMAX, 1 mM sodium  
616 pyruvate, and 25 mM glucose. To determine mitochondrial uncoupling, oxygen consumption  
617 was measured using bio-analyzer from Seahorse Bioscience after addition of 2 µM  
618 oligomycin, which inhibited ATPase, followed by indicated concentrations of ANP or 1 µM  
619 NE. Maximal respiration was determined following 0.3 µM FCCP. 1 mM antimycin A and  
620 rotenone was added to correct for non-mitochondrial respiration<sup>42</sup>.

621

### 622 **Real-time qPCR**

623 Total RNA from tissue or cells was isolated using Qiagen RNeasy kit (Qiagen, GmbH Hilden,  
624 Germany) following manufacturer's protocol. The quantity of the RNA was determined on a  
625 Nanodrop ND-1000 (Thermo Scientific, Rockford, IL, USA). Reverse-transcriptase PCR was  
626 performed using the Multiscribe Reverse Transcriptase method (Applied Biosystems, Foster  
627 City, CA). Quantitative Real-time PCR (qRT-PCR) was performed in duplicate using the  
628 ViiA 7 Real-time PCR system (Applied biosystems). All expression data were normalized by  
629 the  $2^{(-\Delta Ct)}$  method using *18S* in mice and mouse cultures and *PUM1* and *GUSB* in human  
630 cultures, as internal control. Correlation with thermogenic markers gene expression was  
631 assessed using the Biomark HD system with 96 Dynamic Array IFC (Fluidigm) and TaqMan  
632 assays (Applied Biosystems) as described in<sup>24</sup>. Data were normalized using the  $2^{-\Delta Ct}$  method  
633 and *PUM1* as reference gene. Primer sequences are listed in **Supplementary Table 1**.

634

### 635 **Western blot**

636 Proteins were extracted from tissues using RIPA buffer and protease inhibitor cocktail (Sigma-  
637 Aldrich). Tissues homogenates were centrifuged twice for 20 min at 12700 rpm and  
638 supernatants were quantified with BCA pierce kit (ThermoScientific). Equal amount of

639 proteins were run on a 4-20% SDS-polyacrylamide gel electrophoresis (Biorad), transferred  
640 onto nitrocellulose membrane (Bio-Rad) and incubated overnight at 4°C with primary  
641 antibodies, Rabbit anti-ATLG (1:1000, CST #2138s), Rabbit anti-GAPDH (1:1000, CST,  
642 #2118), Rabbit anti-pS660 HSL (1:1000, CST, #4126), Rabbit anti-pS563 HSL (1:1000, CST,  
643 #4139s), Rabbit anti-HSL (1:1000, CST, #4107), Rabbit anti-NPRA (1:1000, Abcam,  
644 ab154266), Goat anti-NPRC (1 :1000, Sigma, SAB2501867), Rabbit anti-p-p38MAPK  
645 (1:1000, CST, #9211), Rabbit anti-P38MAPK (1:1000, CST, #9212), Rabbit anti-UCP1  
646 (1:1000, Abcam, ab10983), Rabbit anti-G6PC<sup>53</sup> (1:2000), Rabbit anti-PEPCK (1:7000, Santa  
647 cruz, #32879), Rabbit anti-Actin (1 :10000, CST, #4970). Subsequently, immuno-reactive  
648 proteins were blotted with anti-rabbit or goat horseradish peroxidase-labeled secondary  
649 antibodies for 1h at room temperature and revealed by enhanced chemiluminescence reagent  
650 (SuperSignal West Femto, Thermo Scientific), visualized using ChemiDoc MP Imaging  
651 System and data analyzed using the ImageLab 4.2 version software (Bio-Rad Laboratories,  
652 Hercules, USA).

653

#### 654 **Statistical analyses**

655 All statistical analyses were performed using GraphPad Prism 7.0 for Windows (GraphPad  
656 Software Inc., San Diego, CA), except for Figure 4A that was produced using the package  
657 corrplot of the R software<sup>10,24</sup>. Normal distribution and homogeneity of variance of the data  
658 were tested using Shapiro-Wilk and F tests, respectively. Student's *t*-tests, Mann-Whitney test  
659 or one-way ANOVA were performed to determine differences between groups/treatments.  
660 Two-way ANOVA followed by Bonferonni's post hoc tests were applied when appropriate.  
661 Univariate linear regressions were performed on parametric data. The false discovery rate for  
662 multiple testing was controlled by the Benjamini-Hochberg procedure with  $p_{adj}$  values  $\leq 0.05$ .

663 as threshold. All values in Figures are presented as mean  $\pm$  SEM. Statistical significance was  
664 set at  $P < 0.05$ .

665

### 666 **Data availability**

667 The data that support the findings of this study are available from the corresponding author  
668 upon reasonable request.

669

### 670 **Acknowledgements**

671 This work was supported by grants from Inserm, Paul Sabatier University, Société  
672 Francophone du Diabète and European Foundation for the Study of Diabetes (C.M.),  
673 Commission of the European Communities (FP6-513946 DiOGenes and HEALTH-F2-2011-  
674 278373 DIABAT to D.L.). D.C. is supported by a Ph.D. fellowship from Inserm/Occitanie  
675 Region. We are very grateful to Caroline Nevoit (ENI CREFRE) and to Sarah Gandarillas and  
676 Candy Escassut (Animal Care Facility CREFRE) for technical assistance in PET/CT imaging.  
677 We also thank Alexandre Lucas (APC core facility), Frédéric Martins (GET-TQ core facility),  
678 and Lucie Fontaine (Histology core facility) for their technical support. We are also grateful  
679 to the study participants in clinical studies. D.L. is a member of Institut Universitaire de  
680 France. We warmly acknowledge Pr. Max Lafontan for critical reading of the manuscript.

681

### 682 **Author contributions**

683 Conceptualization, D.C. and C.M.; Methodology, D.C. and C.M.; Investigation, D.C., M.C.,  
684 E.N., V.B., D.L., C.P., C.L., J.VP., M.S., L.M., MA.M., Y.J., Y.SM., A.M., S.D., G.T., N.V.,  
685 V.B., F.L., A.C., WHM.S., A.A.; Resources, G.M., W.VM.L., P.S., D.L.; Writing – Original  
686 Draft, D.C. and C.M.; Writing – Review & Editing, D.C., E.N., A.C., L.C., G.M., W.VM.L.,  
687 P.S., D.L., and C.M.; Supervision, D.C. and C.M.; Funding Acquisition, D.L. and C.M.

688 **Competing interests:** The authors have no conflict of interest to disclose

689

690 **References**

- 691 1. Nedergaard, J. & Cannon, B. The changed metabolic world with human brown  
692 adipose tissue: therapeutic visions. *Cell metabolism* **11**, 268-272 (2010).
- 693 2. Kajimura, S., Spiegelman, B.M. & Seale, P. Brown and Beige Fat: Physiological  
694 Roles beyond Heat Generation. *Cell metabolism* **22**, 546-559 (2015).
- 695 3. Cannon, B. & Nedergaard, J. Brown adipose tissue: function and physiological  
696 significance. *Physiological reviews* **84**, 277-359 (2004).
- 697 4. Harms, M. & Seale, P. Brown and beige fat: development, function and therapeutic  
698 potential. *Nature medicine* **19**, 1252-1263 (2013).
- 699 5. Wu, J., *et al.* Beige adipocytes are a distinct type of thermogenic fat cell in mouse and  
700 human. *Cell* **150**, 366-376 (2012).
- 701 6. Heine, M., *et al.* Lipolysis Triggers a Systemic Insulin Response Essential for  
702 Efficient Energy Replenishment of Activated Brown Adipose Tissue in Mice. *Cell*  
703 *metabolism* **28**, 644-655 e644 (2018).
- 704 7. Jiang, H., Ding, X., Cao, Y., Wang, H. & Zeng, W. Dense Intra-adipose Sympathetic  
705 Arborizations Are Essential for Cold-Induced Beiging of Mouse White Adipose  
706 Tissue. *Cell metabolism* **26**, 686-692 e683 (2017).
- 707 8. Cao, W., *et al.* p38 mitogen-activated protein kinase is the central regulator of cyclic  
708 AMP-dependent transcription of the brown fat uncoupling protein 1 gene. *Molecular*  
709 *and cellular biology* **24**, 3057-3067 (2004).
- 710 9. Simcox, J., *et al.* Global Analysis of Plasma Lipids Identifies Liver-Derived  
711 Acylcarnitines as a Fuel Source for Brown Fat Thermogenesis. *Cell metabolism* **26**,  
712 509-522 e506 (2017).

- 713 10. Ikeda, K., *et al.* UCP1-independent signaling involving SERCA2b-mediated calcium  
714 cycling regulates beige fat thermogenesis and systemic glucose homeostasis. *Nature*  
715 *medicine* **23**, 1454-1465 (2017).
- 716 11. de Jong, J.M.A., *et al.* The beta3-adrenergic receptor is dispensable for browning of  
717 adipose tissues. *American journal of physiology. Endocrinology and metabolism* **312**,  
718 E508-E518 (2017).
- 719 12. Bachman, E.S., *et al.* betaAR signaling required for diet-induced thermogenesis and  
720 obesity resistance. *Science* **297**, 843-845 (2002).
- 721 13. Kuhn, M. Molecular Physiology of Membrane Guanylyl Cyclase Receptors.  
722 *Physiological reviews* **96**, 751-804 (2016).
- 723 14. Moro, C., *et al.* Atrial natriuretic peptide contributes to physiological control of lipid  
724 mobilization in humans. *FASEB journal : official publication of the Federation of*  
725 *American Societies for Experimental Biology* **18**, 908-910 (2004).
- 726 15. Sengenès, C., Berlan, M., De Glisezinski, I., Lafontan, M. & Galitzky, J. Natriuretic  
727 peptides: a new lipolytic pathway in human adipocytes. *FASEB journal : official*  
728 *publication of the Federation of American Societies for Experimental Biology* **14**,  
729 1345-1351 (2000).
- 730 16. Bordicchia, M., *et al.* Cardiac natriuretic peptides act via p38 MAPK to induce the  
731 brown fat thermogenic program in mouse and human adipocytes. *The Journal of*  
732 *clinical investigation* **122**, 1022-1036 (2012).
- 733 17. Zhang, F., *et al.* An Adipose Tissue Atlas: An Image-Guided Identification of Human-  
734 like BAT and Beige Depots in Rodents. *Cell metabolism* **27**, 252-262 e253 (2018).
- 735 18. Yuan, K., *et al.* Modification of atrial natriuretic peptide system in cold-induced  
736 hypertensive rats. *Regulatory peptides* **154**, 112-120 (2009).



- 737 19. Gnad, T., *et al.* Adenosine activates brown adipose tissue and recruits beige  
738 adipocytes via A2A receptors. *Nature* **516**, 395-399 (2014).
- 739 20. Mallela, J., *et al.* Natriuretic peptide receptor A signaling regulates stem cell  
740 recruitment and angiogenesis: a model to study linkage between inflammation and  
741 tumorigenesis. *Stem Cells* **31**, 1321-1329 (2013).
- 742 21. Mandard, S., Muller, M. & Kersten, S. Peroxisome proliferator-activated receptor  
743 alpha target genes. *Cellular and molecular life sciences : CMLS* **61**, 393-416 (2004).
- 744 22. de la Rosa Rodriguez, M.A. & Kersten, S. Regulation of lipid droplet-associated  
745 proteins by peroxisome proliferator-activated receptors. *Biochimica et biophysica*  
746 *acta. Molecular and cell biology of lipids* **1862**, 1212-1220 (2017).
- 747 23. Puigserver, P., *et al.* A cold-inducible coactivator of nuclear receptors linked to  
748 adaptive thermogenesis. *Cell* **92**, 829-839 (1998).
- 749 24. Coue, M., *et al.* Natriuretic peptides promote glucose uptake in a cGMP-dependent  
750 manner in human adipocytes. *Scientific reports* **8**, 1097 (2018).
- 751 25. Kovacova, Z., *et al.* Adipose tissue natriuretic peptide receptor expression is related to  
752 insulin sensitivity in obesity and diabetes. *Obesity (Silver Spring)* **24**, 820-828 (2016).
- 753 26. Ryden, M., *et al.* Impaired atrial natriuretic peptide-mediated lipolysis in obesity. *Int J*  
754 *Obes (Lond)* **40**, 714-720 (2016).
- 755 27. Coue, M., *et al.* Defective Natriuretic Peptide Receptor Signaling in Skeletal Muscle  
756 Links Obesity to Type 2 Diabetes. *Diabetes* **64**, 4033-4045 (2015).
- 757 28. Frontini, A. & Cinti, S. Distribution and development of brown adipocytes in the  
758 murine and human adipose organ. *Cell metabolism* **11**, 253-256 (2010).
- 759 29. Ohno, H., Shinoda, K., Spiegelman, B.M. & Kajimura, S. PPARgamma agonists  
760 induce a white-to-brown fat conversion through stabilization of PRDM16 protein. *Cell*  
761 *metabolism* **15**, 395-404 (2012).

- 762 30. Jankovic, A., *et al.* Two key temporally distinguishable molecular and cellular  
763 components of white adipose tissue browning during cold acclimation. *The Journal of*  
764 *physiology* **593**, 3267-3280 (2015).
- 765 31. Seale, P., *et al.* Transcriptional control of brown fat determination by PRDM16. *Cell*  
766 *metabolism* **6**, 38-54 (2007).
- 767 32. Sengenès, C., *et al.* Natriuretic peptide-dependent lipolysis in fat cells is a primate  
768 specificity. *American journal of physiology. Regulatory, integrative and comparative*  
769 *physiology* **283**, R257-265 (2002).
- 770 33. Sengenès, C., *et al.* Involvement of a cGMP-dependent pathway in the natriuretic  
771 peptide-mediated hormone-sensitive lipase phosphorylation in human adipocytes. *The*  
772 *Journal of biological chemistry* **278**, 48617-48626 (2003).
- 773 34. Samuel, V.T. & Shulman, G.I. The pathogenesis of insulin resistance: integrating  
774 signaling pathways and substrate flux. *The Journal of clinical investigation* **126**, 12-22  
775 (2016).
- 776 35. Perry, R.J., *et al.* Hepatic acetyl CoA links adipose tissue inflammation to hepatic  
777 insulin resistance and type 2 diabetes. *Cell* **160**, 745-758 (2015).
- 778 36. van Marken Lichtenbelt, W.D., *et al.* Cold-activated brown adipose tissue in healthy  
779 men. *The New England journal of medicine* **360**, 1500-1508 (2009).
- 780 37. Blondin, D.P., *et al.* Dietary fatty acid metabolism of brown adipose tissue in cold-  
781 acclimated men. *Nature communications* **8**, 14146 (2017).
- 782 38. Vosselman, M.J., *et al.* Low brown adipose tissue activity in endurance-trained  
783 compared with lean sedentary men. *Int J Obes (Lond)* **39**, 1696-1702 (2015).
- 784 39. Nedergaard, J., Bengtsson, T. & Cannon, B. Unexpected evidence for active brown  
785 adipose tissue in adult humans. *American journal of physiology. Endocrinology and*  
786 *metabolism* **293**, E444-452 (2007).

- 787 40. Cypess, A.M., *et al.* Identification and importance of brown adipose tissue in adult  
788 humans. *The New England journal of medicine* **360**, 1509-1517 (2009).
- 789 41. Virtanen, K.A., *et al.* Functional brown adipose tissue in healthy adults. *The New*  
790 *England journal of medicine* **360**, 1518-1525 (2009).
- 791 42. Broeders, E.P., *et al.* The Bile Acid Chenodeoxycholic Acid Increases Human Brown  
792 Adipose Tissue Activity. *Cell metabolism* **22**, 418-426 (2015).
- 793 43. Vosselman, M.J., *et al.* Systemic beta-adrenergic stimulation of thermogenesis is not  
794 accompanied by brown adipose tissue activity in humans. *Diabetes* **61**, 3106-3113  
795 (2012).
- 796 44. Hassi, J., Rintamaki, H., Ruskoaho, H., Leppaluoto, J. & Vuolteenaho, O. Plasma  
797 levels of endothelin-1 and atrial natriuretic peptide in men during a 2-hour stay in a  
798 cold room. *Acta physiologica Scandinavica* **142**, 481-485 (1991).
- 799 45. Rohm, M., *et al.* An AMP-activated protein kinase-stabilizing peptide ameliorates  
800 adipose tissue wasting in cancer cachexia in mice. *Nature medicine* **22**, 1120-1130  
801 (2016).
- 802 46. Ouellet, V., *et al.* Brown adipose tissue oxidative metabolism contributes to energy  
803 expenditure during acute cold exposure in humans. *The Journal of clinical*  
804 *investigation* **122**, 545-552 (2012).
- 805 47. Rashed, H.M., Nair, B.G. & Patel, T.B. Regulation of hepatic glycolysis and  
806 gluconeogenesis by atrial natriuretic peptide. *Archives of biochemistry and biophysics*  
807 **298**, 640-645 (1992).
- 808 48. Larsen, T.M., *et al.* Diets with high or low protein content and glycemic index for  
809 weight-loss maintenance. *The New England journal of medicine* **363**, 2102-2113  
810 (2010).

- 811 49. Planat-Benard, V., *et al.* Plasticity of human adipose lineage cells toward endothelial  
812 cells: physiological and therapeutic perspectives. *Circulation* **109**, 656-663 (2004).
- 813 50. Wang, X., Minze, L.J. & Shi, Z.Z. Functional imaging of brown fat in mice with 18F-  
814 FDG micro-PET/CT. *Journal of visualized experiments : JoVE* (2012).
- 815 51. Mithieux, G., Rajas, F. & Gautier-Stein, A. A novel role for glucose 6-phosphatase in  
816 the small intestine in the control of glucose homeostasis. *The Journal of biological*  
817 *chemistry* **279**, 44231-44234 (2004).
- 818 52. Monteillet, L., *et al.* Intracellular lipids are an independent cause of liver injury and  
819 chronic kidney disease in non alcoholic fatty liver disease-like context. *Molecular*  
820 *metabolism* **16**, 100-115 (2018).
- 821 53. Rajas, F., *et al.* Immunocytochemical localization of glucose 6-phosphatase and  
822 cytosolic phosphoenolpyruvate carboxykinase in gluconeogenic tissues reveals  
823 unsuspected metabolic zonation. *Histochemistry and cell biology* **127**, 555-565  
824 (2007).

825 **Figure Legend**

826 **Fig. 1 ANP is required for non-shivering thermogenesis during acute cold exposure**

827 (a) Representative <sup>18</sup>F-FDG PET/CT images of BAT recruitment around the neck in WT mice

828 at room temperature (21°C) and exposed for 5h to 4°C

829 (b) Relative cardiac *Nppa* (ANP) expression in WT mice housed at RT and after acute cold

830 exposure (5h at 4°C) (n=6-10)

831 (c) Plasma ANP levels in WT mice housed at RT and after acute cold exposure (n=10-12)

832 (d) Relative cardiac *Nppb* (BNP) expression in WT mice housed at RT and after acute cold

833 exposure (n=5-10)

834 (e) Plasma *BNP* levels in WT mice housed at RT and after acute cold exposure (n=3-5)

835 (f) Rectal temperature in *Nppa*<sup>+/+</sup> and *Nppa*<sup>-/-</sup> mice housed at RT (n=19-20)

836 (g) Change in rectal temperature from baseline in *Nppa*<sup>+/+</sup> and *Nppa*<sup>-/-</sup> mice during 5h cold

837 exposure (n=5-7)

838 (h) Representative <sup>18</sup>F-FDG PET/CT images of the neck/shoulder area indicating BAT

839 activity in *Nppa*<sup>+/+</sup> and *Nppa*<sup>-/-</sup> mice at RT and during cold exposure

840 (i) Quantitative scatter plot graph and cold-induced BAT activity of *Nppa*<sup>+/+</sup> and *Nppa*<sup>-/-</sup>

841 mice at RT and during cold exposure (n=4)

842 (j) Quantitative scatter plot graph and cold-induced BAT volume of *Nppa*<sup>+/+</sup> and *Nppa*<sup>-/-</sup>

843 mice at RT and during cold exposure (n=4)

844 (k) Muscle <sup>18</sup>F-FDG uptake of *Nppa*<sup>+/+</sup> and *Nppa*<sup>-/-</sup> mice at RT and during cold exposure

845 (n=4)

846 Results are shown as mean ± SEM. \*p<0.05, \*\*p<0.01, \*\*\*p<0.001

847

848 **Fig. 2 ANP-deficiency induces BAT morphological and molecular changes**

849 (a) Representative Hematoxylin/Eosin staining of interscapular BAT (iBAT) sections of

850 *Nppa*<sup>+/+</sup> and *Nppa*<sup>-/-</sup> mice after cold exposure. Scale bar = 50 $\mu$ m

851 (b-c) Relative mRNA levels of *Ucp1* (b) and *Pgc1 $\alpha$*  (c) in iBAT from *Nppa*<sup>+/+</sup> and *Nppa*<sup>-/-</sup>

852 mice housed at RT or after cold exposure (n=4-6)

853 (d) Relative UCP1 protein content in iBAT of *Nppa*<sup>+/+</sup> and *Nppa*<sup>-/-</sup> mice after cold exposure

854 (n=5-9)

855 (e-f-g-h) Relative mRNA levels of *Cpt1b* (e), *Plin2* (f), *Cd36* (g) and *Lpl* (h) in iBAT from

856 *Nppa*<sup>+/+</sup> and *Nppa*<sup>-/-</sup> mice housed at RT or after cold exposure (n=4-7)

857 (i) Relative ATGL protein content in iBAT of *Nppa*<sup>+/+</sup> and *Nppa*<sup>-/-</sup> mice after cold exposure

858 (n=6)

859 (j) Relative pS563 HSL protein content in iBAT of *Nppa*<sup>+/+</sup> and *Nppa*<sup>-/-</sup> mice after cold

860 exposure (n=5-6)

861 Results are shown as mean  $\pm$  SEM. \*p<0.05, \*\*p<0.01, \*\*\*p<0.001, \*\*\*\*p<0,0001

862

863 **Fig. 3 ANP is required for beige adipocyte recruitment and lipolysis during acute cold**

864 **exposure**

865 (a) GCA/NPRC protein ratio in iWAT, eWAT and rpWAT of WT mice housed at

866 thermoneutral temperature (30°C) or after acute cold exposure (5h at 4°C) (n=6-13)

867 (b-c) Representative immunoblot of GC-A, NPRC and GAPDH in iWAT (b) and eWAT (c)

868 of WT mice housed at 30°C or after acute cold exposure

869 (d) Representative immunoblot of GC-A, NPRC, p-p38, p38 and GAPDH in rpWAT of WT

870 mice housed at 30°C or after acute cold exposure

871 (e-f-g) Relative mRNA levels of *Pgc1 $\alpha$* , *Ucp1* and *Prdm16* in iWAT (n=10) (e), eWAT

872 (n=10) (f) and rpWAT (n=3-5) (g) from *Nppa*<sup>+/+</sup> and *Nppa*<sup>-/-</sup> mice after acute cold exposure

- 873 (h) Representative Hematoxylin/Eosin staining of iWAT from *Nppa*<sup>+/+</sup> and *Nppa*<sup>-/-</sup> mice  
874 housed at 30°C or after cold exposure. Scale bar = 50µm
- 875 (i) *Ex vivo* adipocyte lipolysis in eWAT of *Nppa*<sup>+/+</sup> and *Nppa*<sup>-/-</sup> mice housed at 30°C or after  
876 acute cold exposure under basal, ANP 10 µM and isoproterenol 1µM-stimulated conditions  
877 (n=5-8)
- 878 (j) Representative immunoblot and quantitative bar graph of pS660 HSL, pS563 HSL and  
879 HSL total protein in eWAT of *Nppa*<sup>+/+</sup> and *Nppa*<sup>-/-</sup> mice after cold exposure (n=4-5)
- 880 (k) Plasma glycerol levels of *Nppa*<sup>+/+</sup> and *Nppa*<sup>-/-</sup> mice housed at 30°C and after acute cold  
881 exposure (n=3-5)
- 882 Results are shown as mean ± SEM. \*p<0.05, \*\*p<0.01, \*\*\*p<0.001

883

884 **Fig. 4 ANP deficiency impairs plasma triglycerides and glucose responses to cold**

- 885 (a) Plasma triglycerides levels of *Nppa*<sup>+/+</sup> and *Nppa*<sup>-/-</sup> mice housed at RT and after acute  
886 cold exposure (n=9-12)
- 887 (b) Change in plasma triglycerides levels of *Nppa*<sup>+/+</sup> and *Nppa*<sup>-/-</sup> mice housed at RT after  
888 acute cold exposure (n=6-7)
- 889 (c) Representative Hematoxylin/Eosin staining of liver from *Nppa*<sup>+/+</sup> and *Nppa*<sup>-/-</sup> mice after  
890 cold exposure. Scale bar = 50µm
- 891 (d) Liver triglycerides content of *Nppa*<sup>+/+</sup> and *Nppa*<sup>-/-</sup> mice after acute cold exposure (n=7-8)
- 892 (e-f) Relative mRNA levels of *Cd36* (e) and *Cpt1a* (f) in iBAT from *Nppa*<sup>+/+</sup> and *Nppa*<sup>-/-</sup>  
893 mice housed at 30°C or after cold exposure (n=4-7)
- 894 (g) Plasma ketone bodies levels of *Nppa*<sup>+/+</sup> and *Nppa*<sup>-/-</sup> mice housed at RT and after acute  
895 cold exposure (n=10-12)
- 896 (h) Change in blood glucose from baseline in *Nppa*<sup>+/+</sup> and *Nppa*<sup>-/-</sup> mice during 5h cold  
897 exposure (n=10-13)

898 (i-j) Relative mRNA levels of *G6Pase* (i) and *Pck1* (j) in liver from *Nppa*<sup>+/+</sup> and *Nppa*<sup>-/-</sup>  
899 mice housed at 30°C or after cold exposure (n=5-7)

900 (k-l) Relative G6Pase (k) and PEPCK (l) protein content in liver of *Nppa*<sup>+/+</sup> and *Nppa*<sup>-/-</sup>  
901 mice after cold exposure (n=5-6)

902 (m) G6Pase activity in liver of *Nppa*<sup>+/+</sup> and *Nppa*<sup>-/-</sup> mice after cold exposure (n=6)

903 (n) Hepatic glycogen content in liver of *Nppa*<sup>+/+</sup> and *Nppa*<sup>-/-</sup> mice housed at RT or after cold  
904 exposure (n=4-5)

905 Results are shown as mean ± SEM. \*p<0.05, \*\*p<0.01, \*\*\*p<0.001, \*\*\*\*p<0,0001

906

907 **Fig. 5 GC-A is associated with brown/beige and thermogenic markers in human**  
908 **subcutaneous abdominal WAT**

909 (a) Study design of acute cold exposure in human healthy volunteers

910 (b) Plasma ANP levels in human healthy volunteers before and after 60min cold exposure  
911 (n=14)

912 (c) Plasma BNP levels in human healthy volunteers before and after 60min cold exposure  
913 (n=15)

914 (d) Correlation matrix of the 39 brown/beige-specific gene markers significantly correlated  
915 with *GCA*. Color intensity and spread are directly proportional to correlation coefficients as  
916 shown by the vertical scale. The dot line box plot indicates a gene cluster containing *GCA*  
917 indicated by a star \*

918 (e-f-g-h) Univariate linear regression between *GCA* mRNA level and *CA4* (b), *PLIN5* (c),  
919 *PPARα* (d), and *SIRT3* (e) mRNA levels in human WAT (n=79)

920 Results are shown as mean ± SEM. \*p<0.05 vs time point 0.

921



922 **Fig. 6 ANP activates mitochondrial uncoupling in BAT and a thermogenic program in**  
923 **human primary brown/beige and white adipocyte**

924 (a) Oxygen consumption rate (OCR) of human primary brown/beige adipocytes (hBAT) in  
925 absence (control), or presence of ANP 0.1 $\mu$ M, ANP 1 $\mu$ M, ANP 10 $\mu$ M and NE 1 $\mu$ M for 3  
926 hours (n=4). 1: basal respiration, 2: oligomycin, 3: treatments with different doses of ANP  
927 and NE

928 (b) Area under the curve (AUC) of treatment-induced OCR calculated during phase 3  
929 (uncoupled respiration during oligomycin inhibition of ATP synthase) in (A)

930 (c) OCR of human primary white adipocytes WAT (hWAT) in absence (control) (n=6), or  
931 presence of ANP 0.1 $\mu$ M, ANP 1 $\mu$ M, ANP 10 $\mu$ M and NE 1 $\mu$ M for 3 hours (n=4). 1: basal  
932 respiration, 2: oligomycin, 3: treatments with different doses of ANP and NE

933 (d) AUC of treatment-induced OCR calculated during phase 3 in (uncoupled respiration  
934 during oligomycin inhibition of ATP synthase) (C)

935 (e) Maximal OCR (induced by FCCP) of hBAT in absence (control) or presence of ANP  
936 100nM (n=4 independent donors). 4: FCCP, 5: rotenone and antimycin A

937 (f) Maximal OCR (induced by FCCP) of hWAT in absence (control) or presence of ANP  
938 100nM (n=4 independent donors). 4: FCCP, 5: rotenone and antimycin A

939 (g) Relative mRNA levels of brown (*UCP1*, *DIO2*), brown/beige (*CPT1B*, *NDUFB6*, *TFAM*),  
940 and beige (*CITED1* and *ELOVL3*) markers in hBAT in absence (control) or presence of ANP  
941 100nM (n=4)

942 (h) Relative mRNA levels of brown (*UCP1*, *DIO2*), brown/beige (*CPT1B*, *NDUFB6*, *TFAM*),  
943 and beige (*CITED1* and *ELOVL3*) markers in hWAT in absence (control) or presence of ANP  
944 100nM (n=4)

945 Results are shown as mean  $\pm$  SEM. \*p<0.05, \*\*p<0.01, \*\*\*p<0.001 vs control.

946

947 **Fig. 7 ANP triggers cold-induced brown/beige and white fat activation.** Acute cold  
948 exposure increases cardiac preload and promotes ANP secretion by the heart. Cold exposure  
949 also briskly enhances ANP signaling in WAT through an increase of the GCA-to-NPRC ratio.  
950 ANP through GCA activates BAT thermogenesis and induces a transcriptional thermogenic  
951 program in WAT as well as lipolysis. FA and glycerol release by adipose tissue fuels liver TG  
952 and glucose production which are main circulating substrates of BAT to sustain heat  
953 production.

# Figure 1

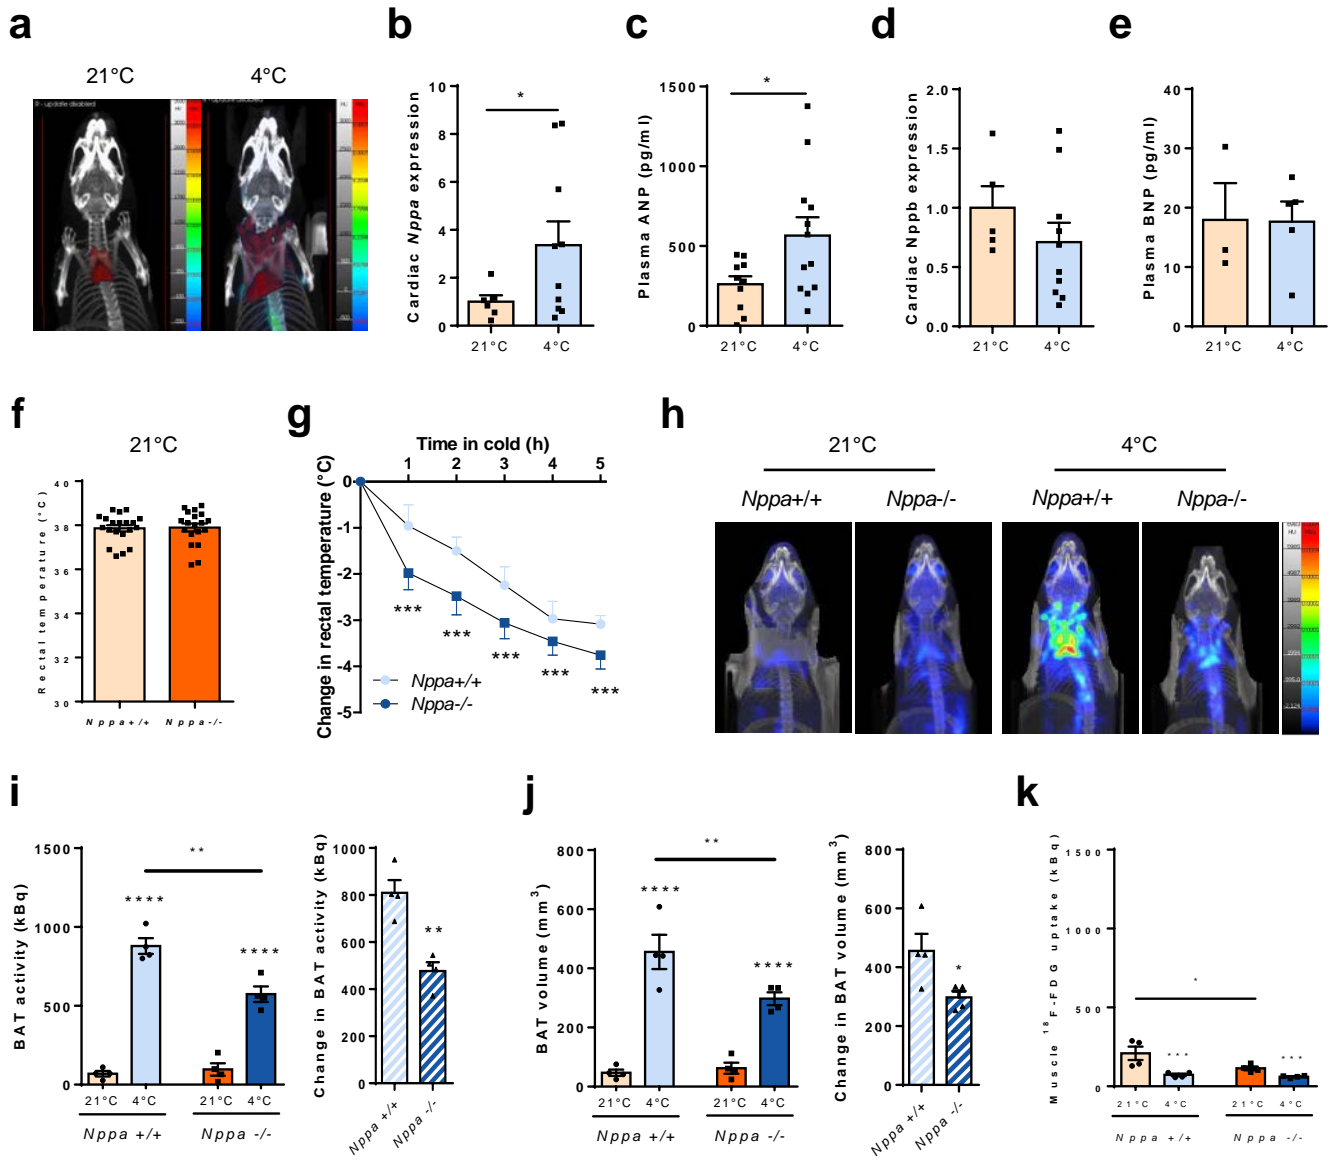

Figure 2

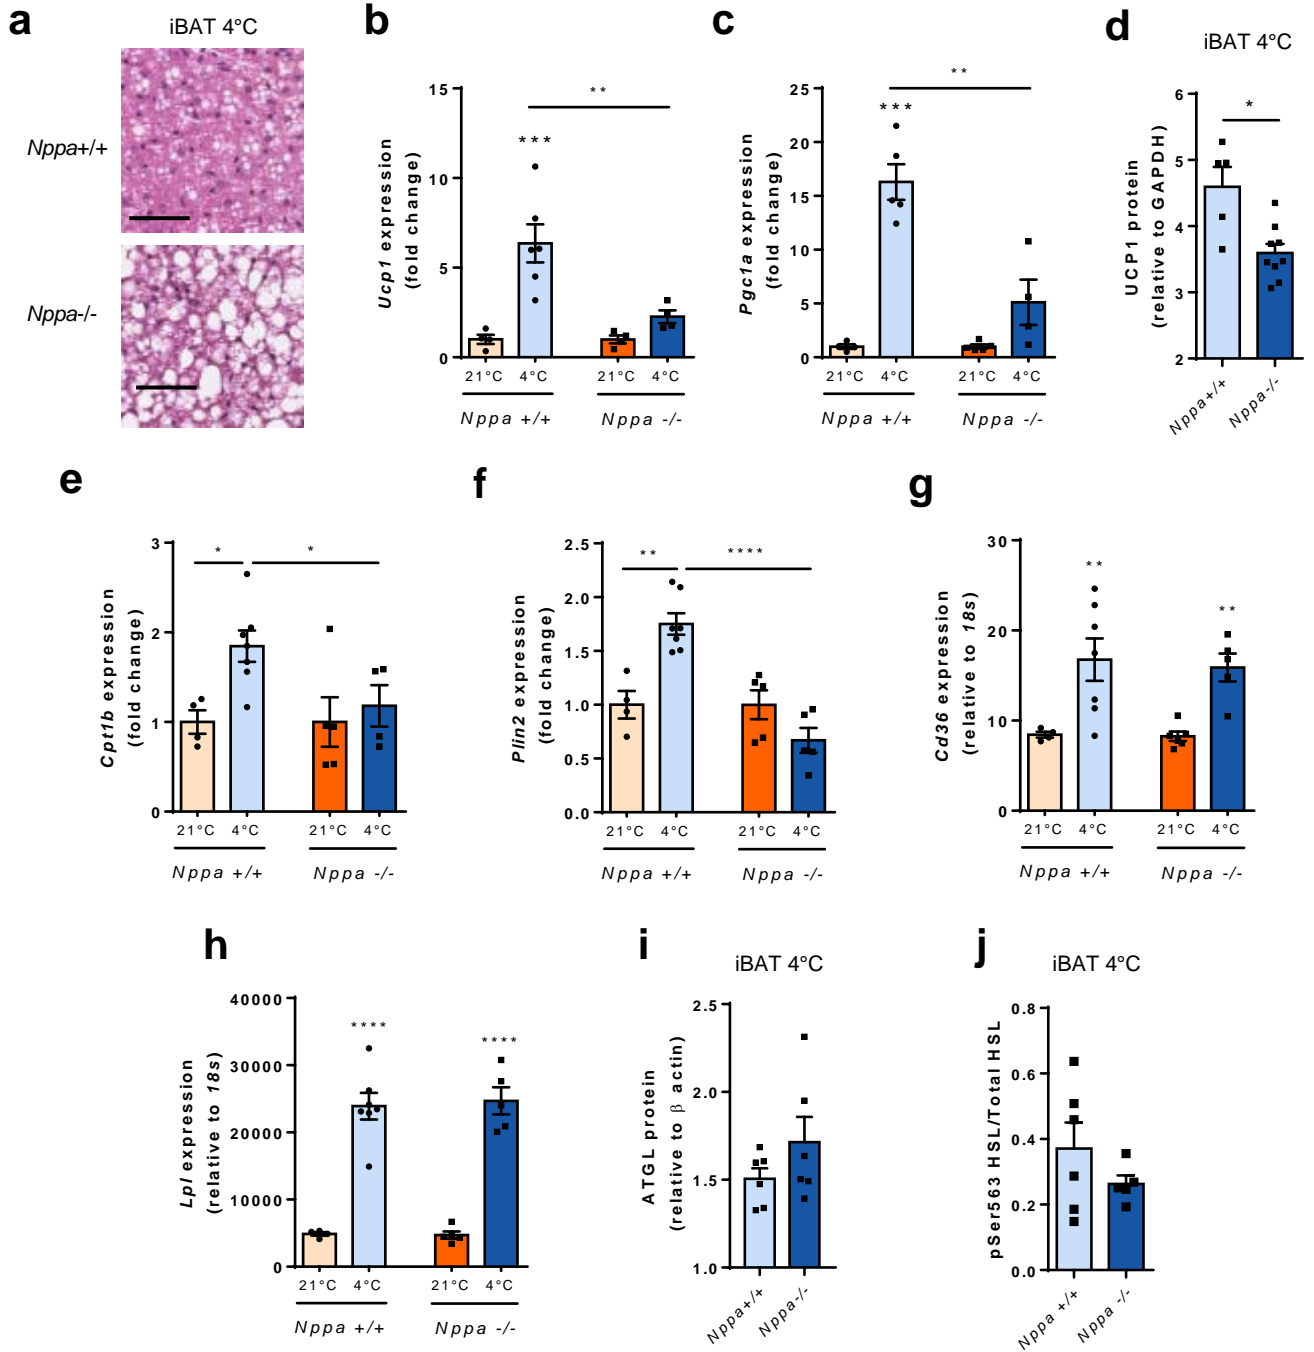

# Figure 3

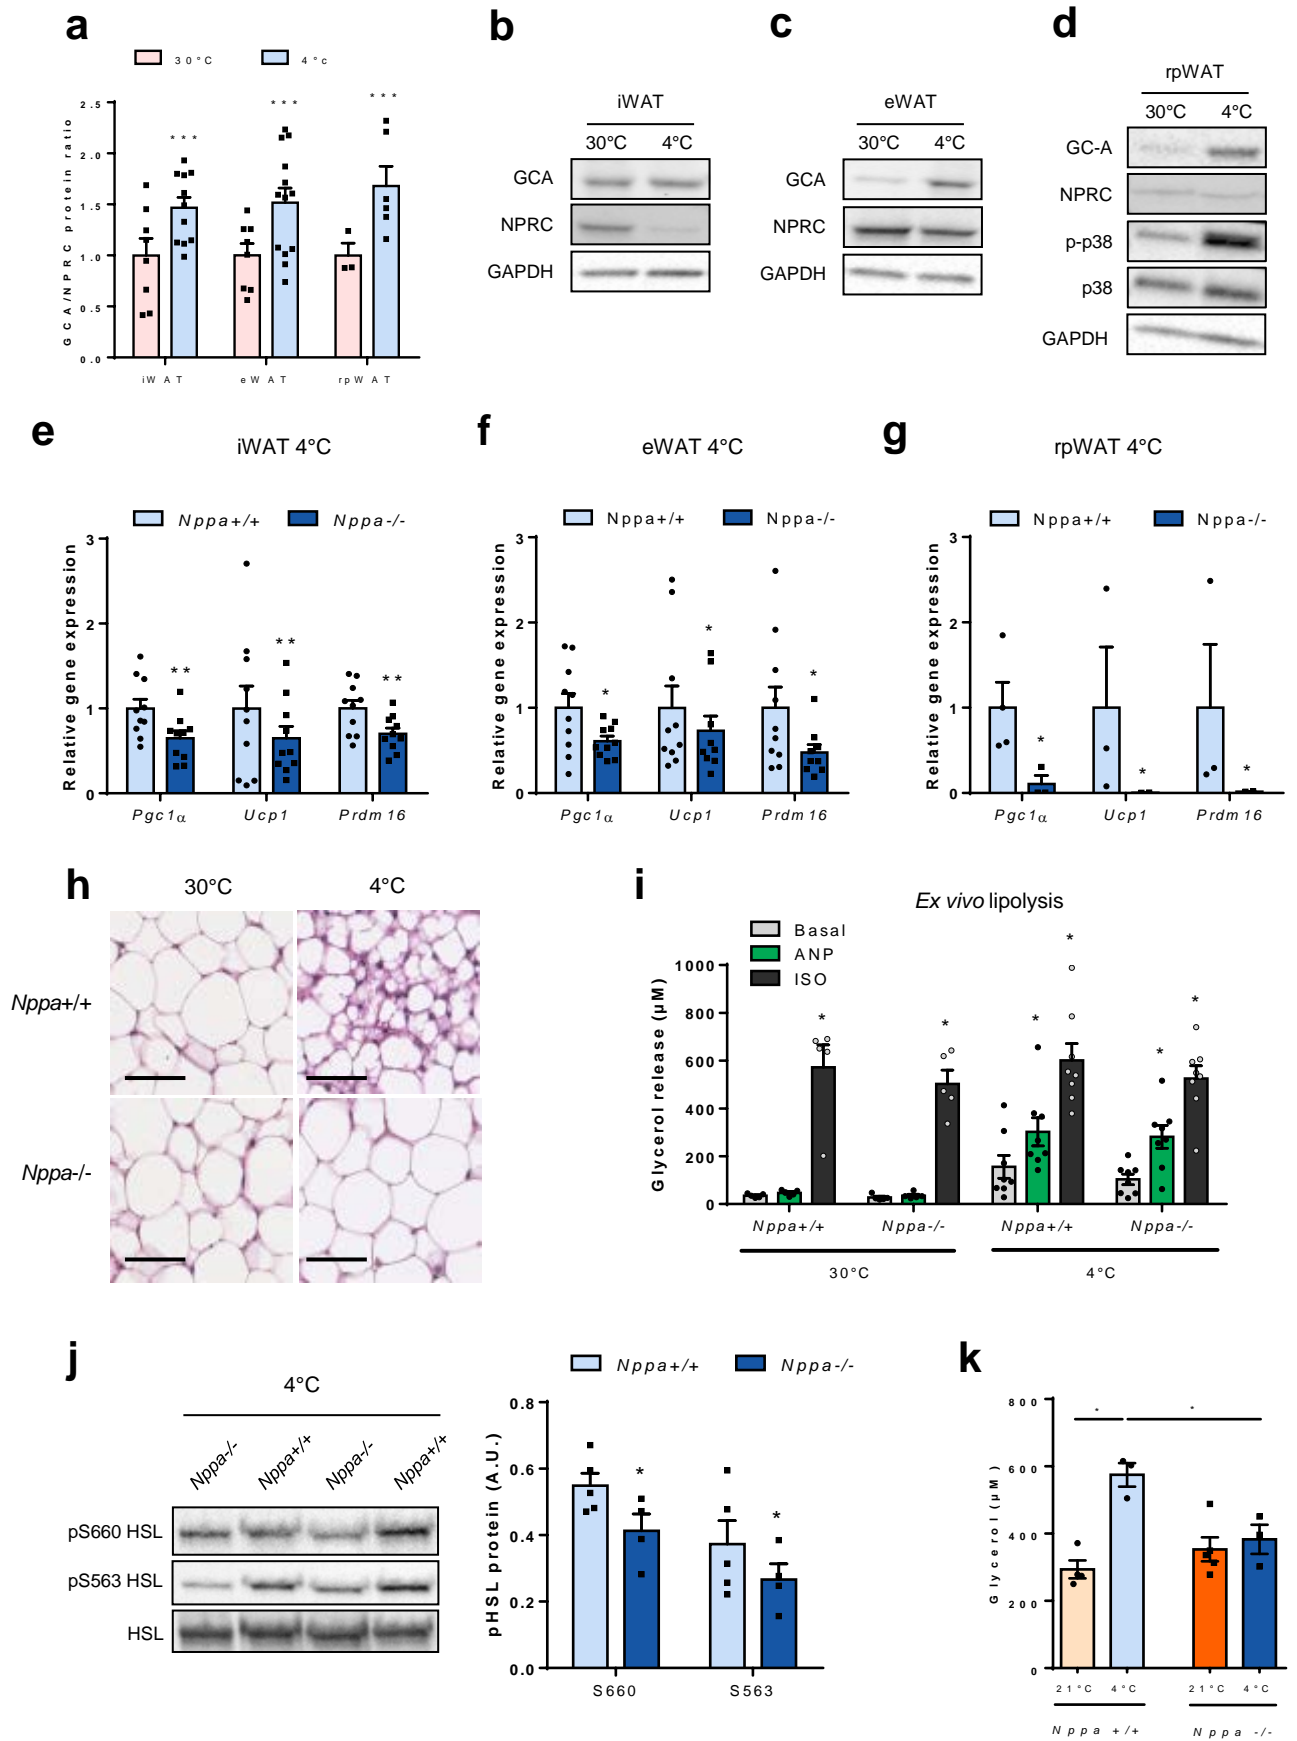

Figure 4

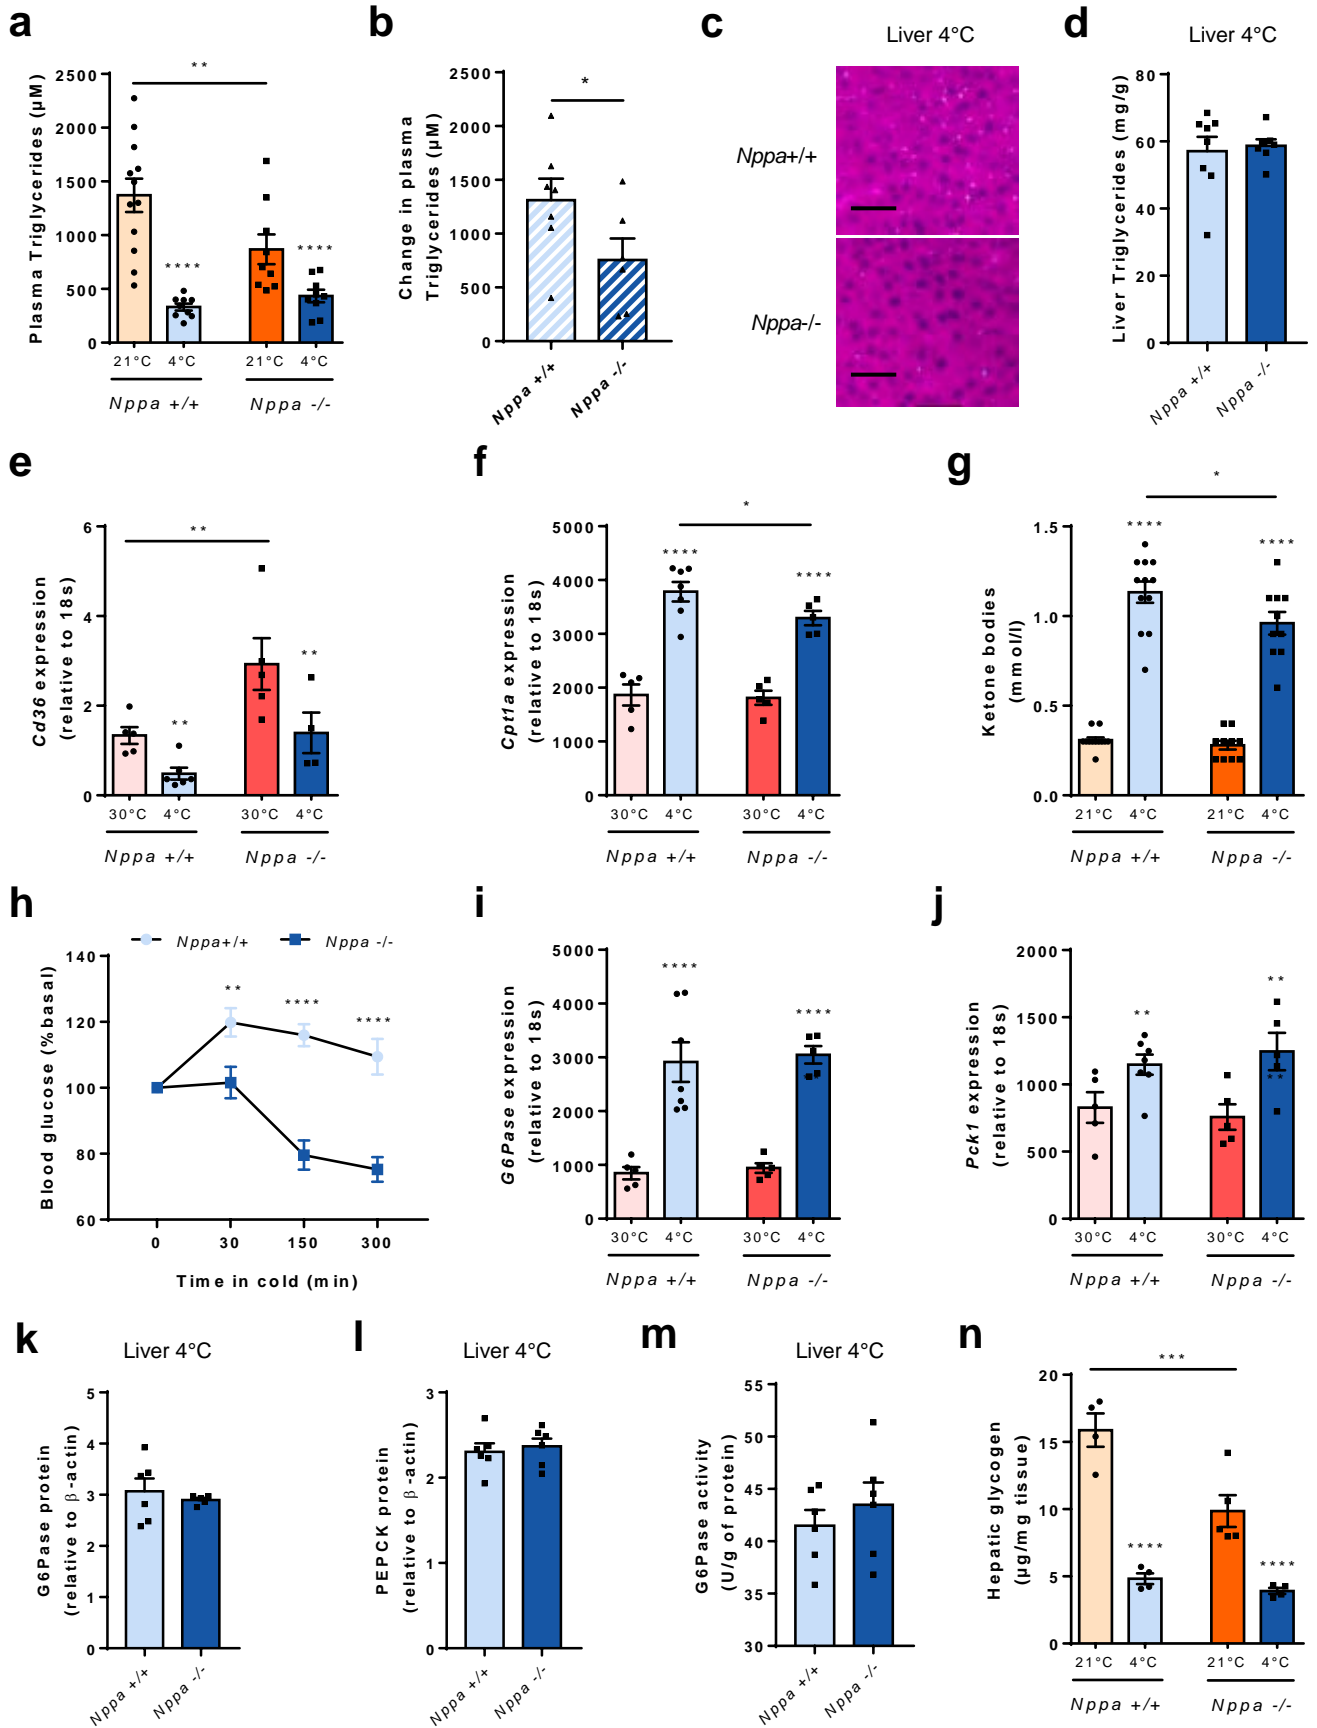

Figure 5

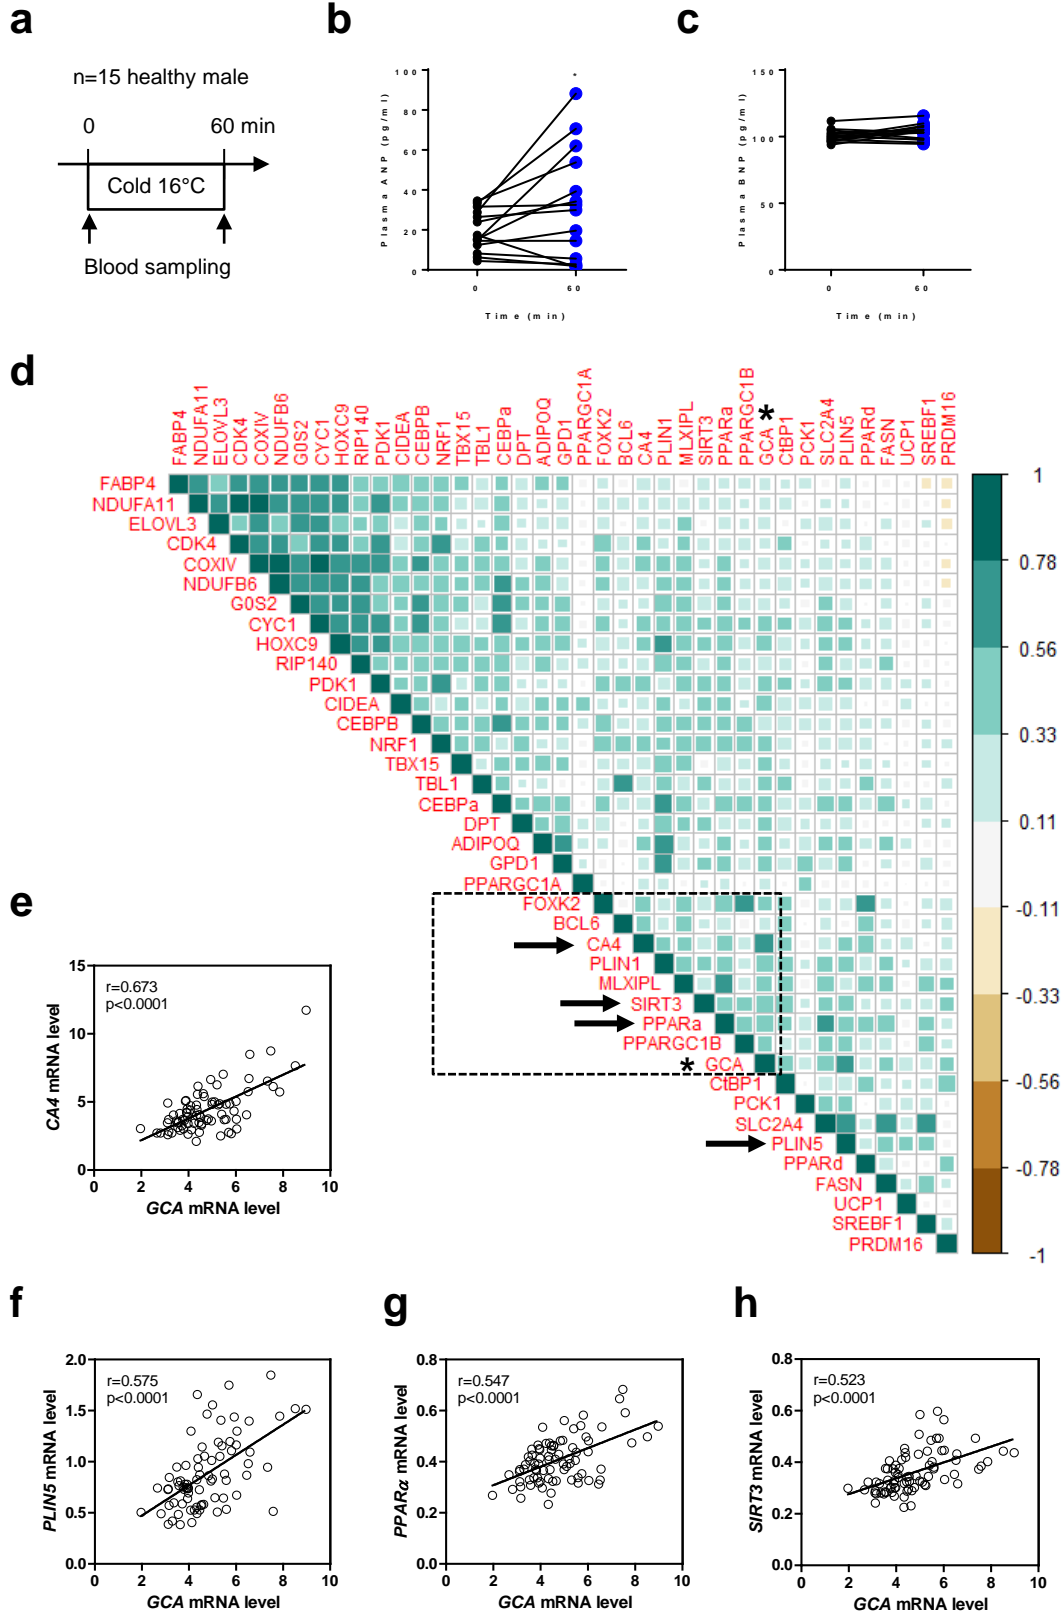

# Figure 6

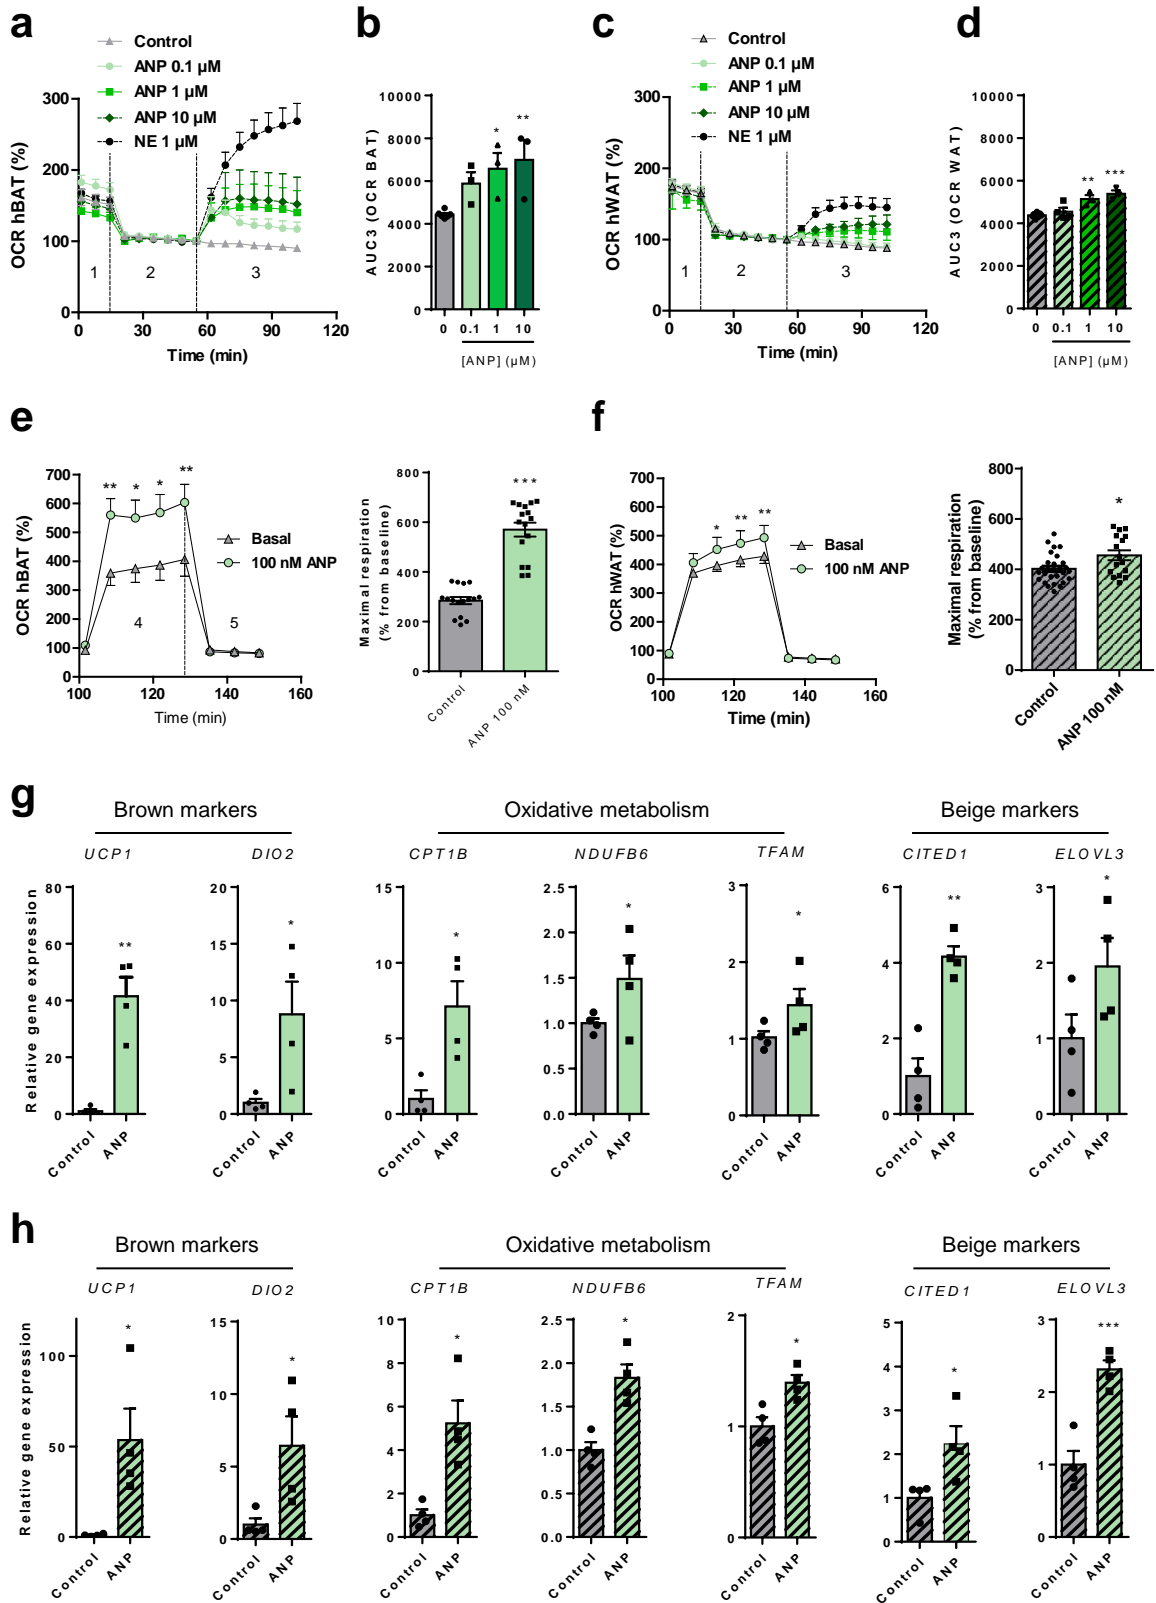



Figure 7

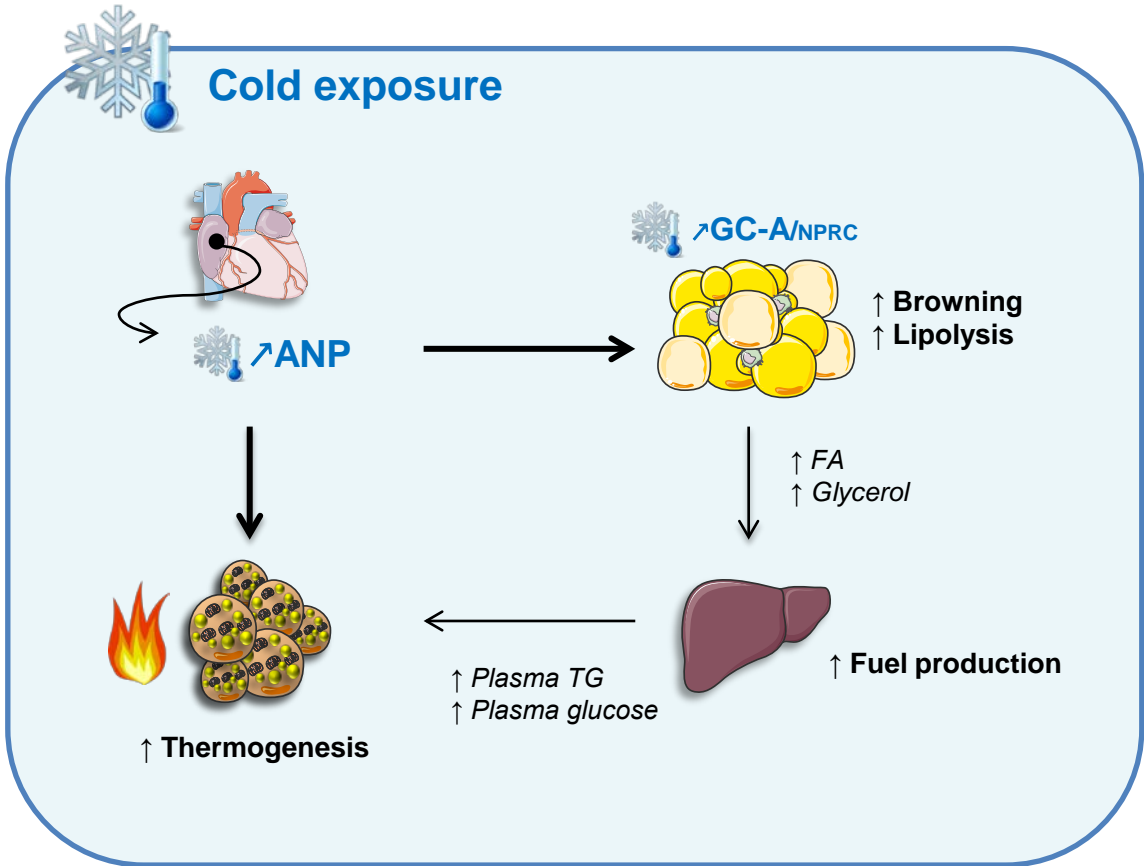

Source: https://biorxiv.org/content/biorxiv/early/2019/12/06/866277.full-text.pdf
